# Supplementary material for: Identification of Chicken Transglutaminase 1 and In Situ Localization of Transglutaminase Activity in Avian Skin and Esophagus
Source: MDPI journal article supplement (doi:10.3390/genes12101565), 2021-09-30
Supplement: s1 [file s1]

**Table S1. Transglutaminases used for phylogenetic analysis**

| Species     | Gene  | NCBI GenBank accession number |
|-------------|-------|-------------------------------|
| Human       | TGM1  | NP_000350                     |
| Human       | TGM2  | NP_004604                     |
| Human       | TGM3  | NP_003236                     |
| Human       | TGM4  | NP_003232                     |
| Human       | TGM5  | NP_963925                     |
| Human       | TGM6  | NP_945345                     |
| Human       | TGM7  | NP_443187                     |
| Human       | F13A1 | NP_000120                     |
| Human       | EPB42 | NP_000110                     |
| Mouse       | TGM1  | NP_001155186                  |
| Mouse       | TGM2  | NP_033399                     |
| Mouse       | TGM3  | NP_033400                     |
| Mouse       | TGM4  | NP_808579                     |
| Mouse       | TGM5  | NP_083075                     |
| Mouse       | TGM6  | NP_808394                     |
| Mouse       | TGM7  | NP_001153896                  |
| Mouse       | F13A1 | NP_001159863                  |
| Mouse       | EPB42 | NP_038541                     |
| Zebra finch | TGM1  | XP_041568788                  |
| Zebra finch | TGM2  | XP_002195997                  |
| Zebra finch | TGM3  | XP_030144662                  |
| Zebra finch | TGM4  | XP_041570454                  |
| Zebra finch | TGM6  | XP_041576223                  |
| Zebra finch | TGM5L | XP_030121789                  |
| Zebra finch | F13A1 | XP_002199785                  |
| Zebra finch | EPB42 | XP_030144378                  |
| Chicken     | TGM1  | n.a.                          |
| Chicken     | TGM2  | NP_001378925.1                |
| Chicken     | TGM3  | XP_040544622                  |
| Chicken     | TGM4  | NP_001006368                  |
| Chicken     | TGM5L | XP_015137927                  |
| Chicken     | TGM6  | XP_040544619                  |
| Chicken     | TGM6L | XP_015152172                  |
| Chicken     | F13A1 | NP_990016                     |
| Chicken     | EPB42 | NP_001308488                  |
| Fruit fly   | Tg    | NP_609174.1                   |

n.a., not applicable (sequence determined in this study)



# A

|                        |                                                                                                        |                                            |
|------------------------|--------------------------------------------------------------------------------------------------------|--------------------------------------------|
|                        | 1                                                                                                      | 100                                        |
| TGM1 human             | MMDG-PRSDVGRWGNFLQPTTSPPEPEPEPD---GRSRGGGRSFWAACCGCCSCRNAADDDWGPEP6DSRGRGSSSGTRRPGSRGSDSRFPVSRGS       |                                            |
| TGM1 zebra finch       | MPD--PRLDRGFP--SLRLTGAPRAFPFSGRRAGLWRLAAAGN---CGCCGCCGRSGGGGGGEWEP1PGETPGRRTAQ-----                    |                                            |
| TGM1 chicken           | MPDADPRLDAGRWAASFRLRGAPSSDPPFRSGSGFWRL---GGC---CGCCGCCRR---GKEDWDFPPGVEVPGRRFPQ-----                   |                                            |
| SRR13171916.38844678.2 |                                                                                                        |                                            |
| SRR13171916.4105304.1  | APSSDPPFRSGSGFWRL---GGC---CGCC                                                                         |                                            |
| SRR13171916.22961509.1 |                                                                                                        | CGCCGCCRR---GKEDWDFPPGVEVPGR5              |
| SRR13171916.35134332.1 |                                                                                                        | KEDWDFPPGVEVPGRRFPQ-----                   |
|                        | 101                                                                                                    | 200                                        |
| TGM1 human             | GVNAAGDGTIREGMLVVNGVDLLSSRSDQNREHHTDEYEYDELIVRRGQPFHMLLLLSRTYE-SSDRITLELLIGNPEVGKGTHTVIIPVKGSGSGWK     |                                            |
| TGM1 zebra finch       | -----PVRPGLLAPVM---LRPGSSTNRTAHTHQEFAPRLVVRGQRFHVGMRLPRE-PRTDGICILELTLPNPQVAKGTHVLVPLGGSSPTGWS         |                                            |
| TGM1 chicken           | -----ALKPGLLVPRG---LVVGSRADRIAHTAEFCSPQLVVRGQPFHLRVLLPRFPDPEDDSLCELLLGPTQVAKGTHVLIPLGETSATGWT          |                                            |
| SRR13171916.35134332.1 | -----ALKP                                                                                              |                                            |
| SRR13171916.34579967.1 | -----KPGLLVPRG---LVVGSRADRIAHTAE                                                                       |                                            |
| SRR13171916.34310259.2 |                                                                                                        | GSRADRIAHTAEFCSPQLVVRGQ                    |
| SRR13171916.37813454.2 |                                                                                                        | ADRIAHTAEFCSPQLVVRGQPFH                    |
| SRR13171916.40142191.1 |                                                                                                        | AHTAEFCSPQLVVRGQPFHLRVL                    |
| SRR13171916.36470078.1 |                                                                                                        | HLRVLLPRFPDPEDDSLCELL5                     |
| SRR13171916.32182126.1 |                                                                                                        | PEDDSLCELLLGPTQVAKGTHVL                    |
| SRR13171916.5625680.2  |                                                                                                        | QVAKGTHVLIPLGETSATGWT                      |
| SRR13171916.29113231.2 |                                                                                                        | TGWT                                       |
|                        | 201                                                                                                    | 300                                        |
| TGM1 human             | AQVVK-----ASGQNLNLRVHTSPNAIIGKFQFTVRTQSDAGEFQLPFPDPNEIYILFNWCPEDIVVVDHEDWRQEVYVLNESGRIYGYTGAQIG        |                                            |
| TGM1 zebra finch       | AEVDEGVAEPIGGGANSGHALMVGLTAPPTAPIGRYRLSARTRTEAGEFAAPFEPDNLDVLFNFWCQSDSVMEQTSDLSEYVLNESGRIFYGTTEEQIA    |                                            |
| TGM1 chicken           | AE--EAGEEAEAGEASGSPALRLRLSAPADAPIGRYRLSVKTRTGAGEFGAFPDDRNDVILFNFWCEEDGVYMEQTNLDNLEYVLNETGRIFYGTTEEQIA  |                                            |
| SRR13171916.5625680.2  | AE--QA                                                                                                 |                                            |
| SRR13171916.29113231.2 | AE--EAGEEAEAGEASGSPALRL                                                                                |                                            |
| SRR13171916.41732328.2 | EEASGSPALRLRLSAPADAPIGRY                                                                               |                                            |
| SRR13171916.32667632.1 |                                                                                                        | IGRYRLSVKTRTGAGEFGAFPDDRN                  |
| SRR13171916.39039682.1 |                                                                                                        | RTGAGEFGAFPDDRNDVILFNFWC                   |
| SRR13171916.38368388.1 |                                                                                                        | TGAGEFGAFPDDRNDVILFNFWCE                   |
| SRR13171916.42307715.2 |                                                                                                        | RNDVILFNFWCEEDGVYMEQTNLD                   |
| SRR13171916.39820236.1 |                                                                                                        | DGVYMEQTNLDNLEYVLNETGRIFYG                 |
| SRR13171916.38559026.1 |                                                                                                        | YVLNETGRIFYGTTEEQIA                        |
| SRR13171916.26942286.1 |                                                                                                        | VLNETGRIFYGTTEEQIA                         |
| SRR13171916.27909714.2 |                                                                                                        | IA                                         |
|                        | 301                                                                                                    | 400                                        |
| TGM1 human             | ERTWNYGQFDHGVLDACLILDRRGMFYGGRGDPVNVSRVISAMVNSLDDNGVLIGNWSGDYSRGTNPASWVGSVEILLSYLRTGYSPYQGCWVFAGVT     |                                            |
| TGM1 zebra finch       | ERAWNYGQFEPGVLDACLFLDRRGMPHGARGDPVMVARVVSAMVNSLDDSGVLVGNWTGIDYSQGTNPASWAGSVGLRSFHTGSPVRYGQCWVFAGVV     |                                            |
| TGM1 chicken           | ERSWNYGQFDAGVLDACLAILDRRRMPSARGDPVMVTRVVSAMVNSLDDNGVLVGNWTGIDYTGQTNPASWAGSDILRSYHRGGAPVRYGQCWVFAGVV    |                                            |
| SRR13171916.38559026.1 | ERSWNYG                                                                                                |                                            |
| SRR13171916.26942286.1 | ERSWNYGQ                                                                                               |                                            |
| SRR13171916.27909714.2 | ERSWNYGQFDAGVLDACLAILV                                                                                 |                                            |
| SRR13171916.41211803.2 | FDAGVLDACLAILDRRRMPSARGD                                                                               |                                            |
| SRR13171916.34827418.1 | GVLDACLAILDRRRMPSARGDPVM                                                                               |                                            |
| SRR13171916.31179310.1 | DACLAILDRRRMPSARGDPVMVTR                                                                               |                                            |
| SRR13171916.25778807.1 |                                                                                                        | MVTRVVSAMVNSLDDNGVLVGNWT5                  |
| SRR13171916.13320237.2 |                                                                                                        | LVGNWTGIDYTGQTNPASWAGSDI6                  |
| SRR13171916.40268579.1 |                                                                                                        | AWAGSDILRSYHRGGAPVRYGQCW                   |
| SRR13171916.42053964.2 |                                                                                                        | LRSYHRGGAPVRYGQCWVFAGVV                    |
| SRR13171916.40167136.1 |                                                                                                        | QCWVFAGVV                                  |
|                        | 401                                                                                                    | 500                                        |
| TGM1 human             | TTVLRCLGLATRTVTNFSAHDDTDSLTMDDIYFDENMKPLERLNDSVNFWNDWCMMRPDLPSGFDGWQVVDATPQETSSGIFCCGQPCSVESIKNGL      |                                            |
| TGM1 zebra finch       | TTVLRCLGLPTRTVTNFSAHDDTDSLTTDIDYLEAMRPLERLNTDSVNFWNDWCMMRPDLPEGYDGWQVVDATPQETSSGIFCCGQPCSVKAVKNQD      |                                            |
| TGM1 chicken           | TTVLRCLGVPTRTVTNFSAHDDTDSLTTDIDYFDENMKPLERLNTDSVNFWNDWCMMRPDLFAGYDGWQVVDATPQETSSGIFCCGQPCSVTAVKNQE     |                                            |
| SRR13171916.42053964.2 | TT                                                                                                     |                                            |
| SRR13171916.40167136.1 | TTVLRCLGVPTRTVTN                                                                                       |                                            |
| SRR13171916.37216926.2 | VLRLCLGVPTRTVTNFSAHDDTDSL                                                                              |                                            |
| SRR13171916.38999933.1 |                                                                                                        | VSLTTDIDYFDENMKPLERLNTDSVW                 |
| SRR13171916.40911907.2 |                                                                                                        | PLERLNTDSVNFWNDWCMMRP7                     |
| SRR13171916.41474269.1 |                                                                                                        | NFWNDWCMMRPDLFAGYDGWQVV                    |
| SRR13171916.39029076.2 |                                                                                                        | CWMRPDLFAGYDGWQVVDATPQET                   |
| SRR13171916.37760965.2 |                                                                                                        | VDATPQETSSGIFCCGQPCSVAAVN                  |
| SRR13171916.39575733.2 |                                                                                                        | GPCSVTAVKNQE                               |
|                        | 501                                                                                                    | 600                                        |
| TGM1 human             | YMKYDTPPIFAEVNSDKVYWQRQDQGSFKIVVVEEKAIGTLIVTKAISNMREDITYLYKHPEGSDAERKAVETAAAHGSKFNVYANRGSADVAMQVE      |                                            |
| TGM1 zebra finch       | YFLKYDTPFVFAEVNSDKVYWQRQAQGFVAVHVEEGAIGRISTGLGATCHARVDITDQYKHPEGSDEERRAVSAATSHGSRPRQRGPTSGGE-VTMTVG    |                                            |
| TGM1 chicken           | VFLKYDTAFVFAEVNSDKVYWQRKGNGAFAlVHVEEGAIGRISTVGPQSAARIDITHLYKHPEGSEARRAVSTATSHGSRPRSGAAPSRGE-VRLSL6     |                                            |
| SRR13171916.39575733.2 | VFLKYDTAFVFAE                                                                                          |                                            |
| SRR13171916.38474934.1 | TAFVFAEVNSDKVYWQRKGNGAFAl                                                                              |                                            |
| SRR13171916.2755541.2  | VNSDKVYWQRKGNGAFAlVHVEEGA                                                                              |                                            |
| SRR13171916.38203596.2 | DKVYWQRKGNGAFAlVHVEEGAIGR                                                                              |                                            |
| SRR13171916.35142.1    |                                                                                                        | GRISTVGPQSAARIDITHLYKHPE                   |
| SRR13171916.36952746.2 |                                                                                                        | IDITHLYKHPEGSEARRAVSTATS                   |
| SRR13171916.40442065.1 |                                                                                                        | EARRAVSTATSHGSRPRSGAAP8                    |
| SRR13171916.36501675.1 |                                                                                                        | APSRGE-VRLSL6                              |
|                        | 601                                                                                                    | 700                                        |
| TGM1 human             | AQDVMGQDLMVSMVLINHSSSRRTVKLHLYLSVTFTYTGSGTIFPKETKKEVELAPGASDRVTMPVAYKEYRPHLVDQGAMLNVSHGVKESQGLAKQH     |                                            |
| TGM1 zebra finch       | SGPAVAGADLELRAVLKNGGLEPRTLRLRFSLCVARYTGVAGAAFQEQHRTLPFGQEDTVMTMTVITYTTEYQPHVGDQDALKLRTAAAVQESQGLAKEL   |                                            |
| TGM1 chicken           | SGPAVAGAELELKVTAHNAAPQPRTVRVLVSVLCALRYTGVAAPFPRHEQHRRVAVPQGGEEQLCVAVFFSEYSPHVSGQDALRLRTAAAVVEETGEVVAKE |                                            |
| SRR13171916.36501675.1 | SGPAVAGAELELK                                                                                          |                                            |
| SRR13171916.42107183.1 | VAGAELELKVTAHNAAPQPRTVRVR                                                                              |                                            |
| SRR13171916.40967521.1 |                                                                                                        | RVRLSVLCALRYTGVAAPFPRHEQHR                 |
| SRR13171916.42145422.2 |                                                                                                        | CALRYTGVAAPFPRHEQHRRVAVPQ                  |
| SRR13171916.37909467.2 |                                                                                                        | HRRVAVPQGGEEQLCVAVFFSEYSPH                 |
| SRR13171916.38874248.2 |                                                                                                        | EQLCVAVFFSEYSPHVSGQDALRLT                  |
| SRR13171916.34832449.1 |                                                                                                        | CVAVFFSEYSPHVSGQDALRLTAA                   |
| SRR13171916.29430382.2 |                                                                                                        | SQDALRLTAAAVVEETGEVVAKE                    |
| SRR13171916.19625563.2 |                                                                                                        | KEL                                        |
|                        | 701                                                                                                    | 800                                        |
| TGM1 human             | TFRLRTPDLSLTLLGAADVQGECEVQIVFKNPLPVTLTNVVFRLESGSLQRPKILNVGDIGGNETVTLRQSFVFPVRPGRQLIASLDSQLSQVHGVIQV    |                                            |
| TGM1 zebra finch       | LVRLHTPELTLTLGPAVVGRFPVSQVVFQNPPLAPLPSASLMEGAGIACPKPLALGSLGAGQTLRLSQSVTPLRAGQRLVATLESAAPLPSGCVQF       |                                            |
| TGM1 chicken           | RVRLAAPDLSMTLLGPPVVQGEVSVQVLFERNPLPQKLTAELRMEGAGLSCPASISVGTVAPEQTLRLRQFVVPLRAGRRRLVAAMESAQLGPVHGELOF   |                                            |
| SRR13171916.29430382.2 | R                                                                                                      |                                            |
| SRR13171916.19625563.2 | RVRLAAPDLSMTLLGPPVVQGE                                                                                 |                                            |
| SRR13171916.41578201.2 |                                                                                                        | GQEVSVQVLFERNPLPQKLTAELRM                  |
| SRR13171916.17212336.1 |                                                                                                        | NPLPQKLTAELRMEGAGLSCPASI                   |
| SRR13171916.34935769.1 |                                                                                                        | GAGLSCPASISVGTVAPEQTLRLRQ                  |
| SRR13171916.37698911.1 |                                                                                                        | TLRLRQFVVPLRAGRRRLVAAMESA                  |
| SRR13171916.38756346.1 |                                                                                                        | VAAMESAQLGPVHGELOF                         |
| SRR13171916.41251451.1 |                                                                                                        | VHGELOF                                    |
| JAENSL010000336.1-part |                                                                                                        | TVAPEQTLRLRQFVVPLRAGRRRLVAAMESAQLGPVHGELOF |
|                        | 801                                                                                                    | 849                                        |
| TGM1 human             | DVAPAPGDGGFFSDAGDSHLGETIPMASRGA-----                                                                   |                                            |
| TGM1 zebra finch       | SAQT--GSGTSGSLTGDGTGREENHTGSGTNGRRRLRRRRRPGGSGTG                                                       |                                            |
| TGM1 chicken           | DAVP--GPDGD--SVEGSAATNGNTRRRRRGGGGR--RRGGRAGSGTG                                                       |                                            |
| SRR13171916.38756346.1 | DAVP--GPD                                                                                              |                                            |
| SRR13171916.41251451.1 | DAVP--GPDGD--SVEGSAATN                                                                                 |                                            |
| SRR13171916.26215572.1 | DAVP--GPDGD--SVEGSAATNGNTRRRR                                                                          |                                            |
| JAENSL010000336.1-part | DAVP--GPDGD--SVEGSAATNGNTRRRRRGGGGR--RRGGRAGSGTG                                                       |                                            |

## B

```
>Gallus gallus TGM1 mRNA (coding sequence)
atgccggacgcggaacccccggctggacgcgggccgttgggtgctgcccagcttccgcctgcggggggcgccgtcctccgaccc
cccccgaggtcgcggggtccttctggcgccgcctgggtggctgctgcgggtgctgcgggtgctgcgggcgaggaaggag
attgggacccccccaggagaggtgcccgggacggagacccccccaggctttgaaacccggcctgctggtcccccggggtctg
gttgtgggttcgagggcgacggcatcgcccaccacacggccgagttctgctccccacagctggtggtccgcccgggggagcc
cttccacctccgggtcctcctccacggcccttcgaccccgaggacgacagcctctgcgtggagctgctgctgggccccaccc
cccaggtggccaaaggcactcacgtgctgatcccatggggcgaaacgtcggccaccggatggacggcgaggaggcgaggag
gaagcggaaggggagggagggcgagcggaagtcccgccctccgggtccgcctctcgccccggcgagcgtcccatgggtcggt
ccgctgagcgtcaaaacccggacgggagcgggggaggttcggggcgccctttgatgaccgcaatgacgtcatcgtgctgttca
accctggtgtgaggaggtgggtgtacatggagcaaaactaacgacctaatgagtagctccttaacgagacgggcccgcac
ttctatggcacggaggaacagatcgagagcgctcctggaactacgggcagtttgacgcaggggtcctggatgcctgcttggc
cataatggacggcgccggatgccccacagcgccaggggggaccccgatggtgaccagagtggtgctcgccatggttaaact
ccctggatgacaacgggttctggttgggaactggaccggggattacacgcagggcaccaaccgctcgccctgggcccggctcg
gtggacatcctgcgctcctaccaccgcgggggggcgccggtgcgctacgggcagtgctgggtgttcgcccggcgttgtcaccac
cgtgctgcgctgctgggggtgcccacgcggacgggtgacgaactacaactcggcgccacgacacggacgtgctgcgtgaccaccg
acatctacttcgacgagaacatgaagccctcgagcgctcaacaccgactccgtctggaacttccacgtgtggaacgactgc
tggatgcgcgcggccggacctccctgcgggatacgacggctggcaggtggtggacgccaccccgaggagaccagcagcgggct
gttctgctgtgggcccgtgctccgtgacggccgtgaagaacggggaggtcttctcctcaaatacgacactgccttcgtcttcgccg
aggtaacagcgacaaggtgtactggcagcggaagggaacgggccttcgccatcgtccacgtggaggaaggcgccatcggg
cgccgcatcagcacctggggcccgagtcggccgcccgcacatcacacacccctacaaacaccccgagggctcgaggcg
ggagcgtcgcgcggtgtccacggcgacatctcacggctcccgccctcgacggcgcgcgccgctcccggggggaggtgcggc
tgtcgtgagctccgggcccgggtggcgggggcgagttggagctgaaagtacgggtcacaacgcggctccgcagcccgcg
accgtccgggtgcggctgtccgtctgcgcgtgcggtacaccggagtgccggcgccgccttcgccacgagcagcacaggag
ggtcgtggcgccggggggggaggagcagctgtgtgtggcggtgccgttctcgagtagacagccccacgtgggctctcaggacg
cgctccgtctgacggcgggcgggcggtggaggagacgggggaggtggtggccaaagagctgcgcgtccgcctggcgggcccc
gacctcagcatgacgtgctgggcccccggtttagggcaggaggttccggtcaggtcctcttcgggaatccgctgccccca
gaagctcacggggggcgagcttcgcatggagggggcggggctgtcctgccccgcacatccatcagcgtcggcacgggtggcccccg
agcagacctgcggctccgtcagcccggtggtgcctctcggggcccggcgccgtcggttgggtggccgcatggaaagcgcccag
ttgggccccgtccacggagagctgcaattcgacgccgtcccgggacccgacggggacagcgtggagggcagcgcggaaccaa
cggcaacacgaggagggaggagggggggagggggcgggcgccggggggggagggcgggggggagcaccgggggggtga
```

## C

```
>Gallus gallus TGM1
MPDADPRLDAGRWAASFRLRGAPSSDPPPRSRSFSWRLGGCCGCCGCCRRGKEDWDPPPGEVPGRRPPQALKPGLLVPRGL
VVGSRADRIAHTAEFCSPQLVVRGQPFHLRVLLPRFPDPEDDSLCEVLLLGPTPQVAKGTHVLIPLGETSATGWTAEEAGE
EAEEGEASGSPALRLRLSAPADAPIGRYRLSVKTRTGAGEFGAPFDDRNDVIVLFNFWCEEDGVYMEQTNDLNEYVLNETGRI
FYGTTEEQIAERSWNYGQFDAGVLDACLAAILDRRRMPHSARGDPMVTRVVSAMVNSLDDNGVLVGNWTGDYTGQTNPSAWAGS
VDILRSYHRGGAPVRYGQCWVFAGVVTTLRLCLGVPTRTVTNYSNAHDTDVSLTTDIYFDENMKPLERLNTDSVWNFHVWNC
WMRRPDLPAGYDGVVQVVDATPQETSSGLFCCGPCSVTAVKNGEVFLKYDTAFVFAEVNSDKVYWQRKNGAFAIVHVEEGAIG
RRISTVGPQSAARIDITHLYKHPEGSEAEERRAVSTATSHGSRPRSAGAAPSARGEVRLSLSSGPAVAGAELELKVTAHNAAPQPR
TVRVRLSVCALRYTGVAAPPFRHEQHRRVVAPGGEQLCVAVPFSEYSPHVGSQDALRLTAAAVEETGEVVAKELRVRLAAP
DLSMTLLGPPVVGQEVSVQVLFNPLPQKLTGAELRMEGAGLSCPASISVGTVAPEQTLRLRQPVVPLRAGRRRLVAAMESAQ
LGPVHGELQFDAVPDGDSDVEGSAATNGNTRRRRRGGGRRRGGRAGGSTGG
```

**Figure S1. Chicken TGM1 sequence assembly. (A)** Alignment of amino acid sequences of TGM1 proteins of human and zebra finch versus translated sequences of chicken TGM1 nucleotide sequence fragments. RNA-sequencing reads from chicken in vitro skin models were subjected to tBLASTn search for TGM1. The sequences of the RNA-seq reads are shown in Supplementary Table S1. **(B)** Nucleotide sequence of the coding region of chicken (*Gallus gallus*) TGM1 mRNA. **(C)** Amino acid sequence of chicken (*Gallus gallus*) TGM1 protein.

>mouse\_TGM1

LVVTGVDLLCDQNRREHHTDEFEYDELIVRRGQPFHMILFLNREYESSDRIALELLIGSNP  
EVGKGTHV IIPVGKGGSGGWKAQVTKNNGHNLNLRVHTSPNAIIIGKFQFTVRTRSELPFDP  
RNEIYILFNPWCPEDIVYVDHEDWRQEYVLNYESGRIYYGTEAQIGERTWNYGQFDHGVLDA  
CLYILDRRGMPYGGRGDPVSVSRVVSAMVNSLDDNGVLIGNWTGDYSRGTNPASAVGVSVEI  
LLSYLRTGYSVPYGCWVFAGVTTTVLRCLGFATRITVTFNSAHDTDTSLTMDIYFDENMK  
PLHLNHDVWNFHVWVNDWCWMKRPDLPSGFDGWQVVDATPQETSSGIFCCGPCSVEVSKNGL  
VYMKYDTPFIFAEVNSDKVYWQRQDDGSFKIVYVEEKAIGTLIVTKAIHSNNREDITHIYK  
HPEGSEAERRAVEKAAAHGSKPNVYATRDSAEDVAMQVEAQDAVMGQDLAVSVVLTNRGSS  
RRTVKLHLYLCVTYYTGVSGPTFKEAKKEVTLAPGASDSVTMPVAYKEYKPHLVDQGAMLL  
NVSGHVESGQVLAKQHTFRLRTPDLSTLLGAAVVGQECGVQIVFKNPLPVTLTNVVRLE  
GSGLRPKVLNVGDIGNETVTTLRQTFVPVRPGPRQLIASLDSPLSQVHGVIVQVDVAP

>mouse\_TGM2

LLLERCDLEIQANGRDHHTADLCQEKLVLRRGQRFRLTLYFGRGYEASDSLTFGAVTGPDP  
SEEAGTKARFSLSDVEEGSWSASVLDQQDNVLSLQLCTPANAPIGLYRLSLEASTGGSSFV  
LGHFILLYNWCPADDVYLDSEERREYVLTQQGFIYQGSVKFIKSVPWNFQGFEDGILDT  
CLMLLDMNSRDCSRSSPIYVGRVVSAMVNCNDDQGVLLGRWDNNYGDGISPMAWIGSVDI  
LRRWKEHGQQVKYGCWVFVAAVACTVLRCLGIPTRVVTNYSNHAHDQNSNLLIEYFRNEFGE  
LESNKSEMIWNFHCWVESWMTRPDLQPGYEGWQAIDPTPQEKSEGTYCCGPVSVRAIKEGD  
LSTKYDAPFVFAEVNADVVDWIRQEDGSVLKSINRSLVVGQKISTKSVGRDDREDITHYK  
YPEGSPEEREVFTKANHLNKLAE-----

KEETGVAMRIRGDSMSGNDFDVFAHIGNDTSETRECRLLLCARTVSYNGVLGPECTED-  
INLTLDPYSENSIPLRILYKEYSGCLTESNLIKVRGLLIEAANSYLLAERDLYLENPEIKI  
RVLGEPKQNRKLVAEVS LKNPLSDPLYDCIFTVEGAGLTKQKSVEVSDVPAGDLVKARVDL  
FPTDIGLHKLNVNFQCDKLSVKGYRNVIIIGP

>mouse\_TGM3

LQIQNVNWQVPMNRRAHHTDKFSSQDSIVRRGQPWEIILVCNRSLESGEDLNFIVSTGPPQ  
SESARTKAVFSISGRSTGGWNAALKANSNNLAIAIASPVSAPIGLYTLVSEISSRASSLK  
LGTIFIMLFNPWLQADDVFMSNHAERQEYVEEDSGIIYVGSTNRIGMVGWNFGQFEEDILNI  
SLSILDRSVTDVARRNDPKYVCRVLSAMINGNDDNGVISGNWSGNYTGGVDPRTWNGSVEI  
LKNWKKSGRPVQFGQCWVFAGTLNTVLRCLGVPSRVITNFNSAHDTDRLNSVDVYYDAMGN  
PLEKGSDSVWNFHVWNEGWFVRTDLGPTYNGWQVLDATPQERSQGVFQCGPASVNAIKAGD  
VDRNFDIMFIFAEVNADRITWIYNNRNTQKQNSVDTHSIGKYISTKAVGSNSRMDVTDKYK  
YPEGSSEERQVHQKALDKLPNASFGAEDKEPSISGKFKTGILAVGKEVSLSLMLKNMTND  
RKTVTMNMATAWTIVYNGTLVHEVWKDSATISLDPEEEIQYPVKIAYSQYERYLKADNMIRI  
TAVCKVPDEAEVVVERDVILDNPALTLEVLEQAHVRKPVNVQMLFSNPLDQPVNNCVLLVE  
GSGLLRSLKIDVPSLRPKEKSRIRFEIFPTRSGTKQLLADFS CNKFP AIKAMPLIDVSE

>mouse\_TGM4

LIIYAVNVERKLNAAAHHTSEYQTKKLVLRRGQIFTLKVIILNRPLQPQDELKVTFFTSG---  
QRDPPEYVVELDPVTYRSKGWQVKIAKQSGVEVILNVI SAADAVVGRYKMRVN-----  
EYKAGVFYLLFNPWCSDDSVFMASEEERA EYI LNDTGMYMGMGFAKQIKEKPWTFGQFEKHI  
LSCCFNLLF--QLENNEMQNPVLVSRAICTMCAA-  
NGGVLMMGNWTGDYADGTAPYVWTSSVPI LQQHYVTRMPVRYGQCWVFSGILTALRAVGIP  
ARSVTNFESAHDTEKNLTVDIYLDESGKTIHLTKDSVWNFHVWTDAMMKRQDLPHGYDGWQ  
VLDSTPQEI SDGGFTGPSPLTAIRQGLIQMKYDTTFVFTEVNGDKFIWLVKQNEKNILIA  
VETASIGKKISTKMGVGENREDITLQYKFPEGSPEERKVMASGKPSDDKLSNR-  
TLNNSLQISVLQNSLELGAPIYLTITLKRKTATPQNVNISCSLNLQTYTGNNKTNLGVIOK  
TVQIHGQES-

RVFLTMDASYIYKLGDEMVIIGGFIIAEIDSGERVATDTTLCFLYSAFSVEMPSTGKVKQP  
LVITSKFTNTLPIPLTNIKFSVESLGLANMKSWEQETVPPGKTITFQMECTPVKAGPQKFI  
VKFISRQVKEVHAEKVVLISK

>mouse\_TGM5

LEVALTDLQSSQNNVRHHTEEISVDRLVRRGQAFSITLYFNRGFQPGDSIMFVAETGPLP  
DLAKGTRAVFSFTGGGSPWIASLEANRANSLEVSLCAPPAAVGRYLLKIRIDSYVTAYQ  
LGEFILLFNPWCPADSVYLESEPQRQEYVVNDYGFIIYQGSKSWIRPCPWNYGQFEENIID  
CLELLEKSSTDALRGSPVYTSRVVCAMINSNDDNGVLNGNWSSENYVDGINPAEWTGSVAI  
LKQWHATGQPVRYGQCWVFVAAVMCTVMRCLGIPTRVITNFDSGHD TDGNLI IDEYYDNTGR  
ILNMKKDVTWNFHVWNECWMARKDLPPGYGGWQVLDATPQETSNGLYCCGPASVKAIKEGE  
IDLNYDTRFAFSMVNADCMSWLVIYG-  
GKEQKLHQDTATVGNFISTKSIQSDERDDITESYKYEESLQEREVFLKALQKLQATRSQG  
PPSDVLQVSLKFELDSPKMGQDINFVLLAVNMSPQFKDLKLNLSAQSLLDGSPLPVFWQD  
TAFITLFP EEKSYPCILYSQYSQYLSTDKLIRISALGEENSPEKILVNKIITLTFPGIM

INVLGAAFVNQPLTVQVVF SNPLSEPVEDCVLTLEGSGLFRQQRVLIGVLKPHHKASITLK  
TVPFKSGQRQIQANLRSNRFKDIKGYKNVYVDI  
>mouse\_TGM6  
VRITKVDWQHSKNGAAHHTQDYPCSELVVRRGQLFSLTLDLSRVLDSEEALIFTVETGPHA  
SEALHTKAVFQTAAEEIGDTWTAAKEEQ TENTITVSLSSPSNAVIGRYLLSVRPSSRHS DRK  
LGQFILLFNPWCPEDDVFLDSEEERQEYVLNDSGVI FRGVEKH IRAQGWNYGQFEEDILNI  
CLSILDRSATDVSHRHPVYVTRIISAMVNSNDRGVVQGWQGYGGGTNPLNWRGSVAI  
LQKWFKGRKPVKYGQCWVFAGVMCTVLRCLGIATR VVS NFNSAHD TDGNLSVDKYVDSYGR  
TLDLTEDSMWNFHVWNESWFARQDLGPSYD GWQVLDATPQEESEG MFR CGPASVTAIREGD  
VHLAHDGPFVFAEVNADYITWLWHEDKR RRVYS DTKKIGRCISTKAVGSDSRVDITGLYK  
YPEGSRKERQVYSKAVKKLLSVEAWGRPVTKPSITGKF KLEPPVLGQDLKLALCLTNLTAR  
AQRVRVNVSGATILYTRKPVAEILRESHTVKLGPLEEKKIPVTISYSQYKGDLTEDKKILL  
AAMCLVSKGEKLLVEKDITLED-  
FITIKVLGPAVVGVTVTVEVLVINPLSESVKDCVLMVEGSGLLQQLSIEVPSLQPQEKALI  
QFNITPSKSGPRQLQVDLVSSQFPDIKGFVIIHVAT  
>mouse\_TGM7  
LELRSVELQIPRNNKDHTEDLGLSKLILRRGQIFIL TIVFSRPFQPDHLTFVAETGPEP  
TELLGTRATFFLAQRPENVWSASDFMIDSNSLQVSIFSPASAVIGHYTLKLEISQGGVTYP  
LGNFILLFNPWSTEDDVYLPSETLLREYIMSDYGF IYKGQ TNSITSRPWNYGQFEEDIVDI  
CFEILNKSSKDHSQRNNVYVCRVVSAMINSNDDSGVLQGNWGEDYSQGTSPLEWNGSVAI  
LRQWSAKGQPVKYGQCWVFASVMCTVMRCLGVPTRVVS NFHSAHNTDGNLTIDTYYDR TAE  
MLAQRPDKIWNFHVWNECWMIRKDLPPGYNGWQVLDPTPQQTSSGLFCCGPASVKAIKEGD  
VQLPYDTPFVYAEVNADEVVWLFEGGQVQEILAHNTSYIGKAISTKMVGSDERL DITSSYK  
YPEGSSEERSAFIKASWKLEPRRNASNLKAKPVRLQLHVRAPMWGQDLPMLYVQRPVPR  
DHGLTVRFCAQALLHGGGTRKPFWRHIVHLNVDFEKELQWPFLLPYSSYRDKLTDERLIRV  
AGIAEVETGQFILVLKDFSLEPPHLSIEVFERA EVGKALDIHITLTNTLMVPLN NCTMVL E  
GSGLINQMTKDLGTL MAGHTIRIHLELYPIKAGPHQLQVLISSSEVKEIKGYKDILVAA  
>mouse\_F13A1  
LNVTAVHLFKDSNKIDHHTDKYDNNKLIVRRGQTFYI QIDFNRPYDPRDLFRVEYVIGRYP  
QENKGTYIPVPVVKLQSGKWGAKVIMNEDRSVRLSVQSSPECIVGKFRMYVAVWTPTRRDP  
ETDTYILFNPWCEEDAVYLDDEKERE EYVLNDIGVIFYGDFKDIKRSWSY GQFEDGILDT  
CLYVMDKAEMDLSGRGNPIKVS RVGSAMVNAKDDEGVLVGSWDNVYAYGIPPSAWTGSVDI  
LLEYRSSETPVRYGQCWVFAGVFNTFLRCLGIPARVITNYFSAHDNDANLQMDIFLEEDGN  
VSKLTKDSVWNYHCWNEAWMTRPDLPGVFGGWQAVDSTPQENS DGM YRCGPASVQAVKHGH  
VCFQFDAPFVFAEVNSDLVYITAKQD GTHVVEAVDATHIGKLI VTKQIGGDGMQDITDTYK  
FQEGQEEERLALETALMYGAKKTLNTEVKRSRSDVTMNF DVENAVLGKDFKVTITFQNNSSN  
LYTILAYLSGNITFYTGVS KKEFKKESFEETLDPFSSKKKEVLVRAGEYMSHLL EQGFLHF  
FVTARIESRDVLAKQKSIILTIPKITIKVRGAAMVGS DMVVTVEFTNPLKETLQNVWIHL D  
GPGVMRPKRKVFREIRPNTTVQWEEVCRPWVSGHRKLIASMTSDSLRHVYGELDLQIQR  
>mouse\_EPB42  
LSIKSCDFHAAENNEEHYTKAISSQHLTLRRGQSFTITLNFRA PFLSAKKVALIAQTGEQP  
SKINKTQAIFPISSGDQKGWSAAVEERDAQHWT VSVTTPVDAVIGHYSLLLQVSGK-  
KQYPLGQFTLLFNPWNRDDAVFLQNEAERTEYVLNQNGFIYLG TADCIQEEPWDFGQFEKD  
VMDLSLKLLSM-  
DKQVKDWNQPAHVARVVGALLHALKKKSVLPISQTQAAQEGALLYKRRGSVPILRQWLTGQ  
RAVYETQAWVSAAVACTVLRCLGIPARVVTTFDSAQGTVGSLLVDEYYNEEGLQNEGQRGH  
IWV FQTSVECWMMNRPDLSQGYGGWQILHPRAPNGAGVLGSCSLVPVRAVKEGELQLDPAPV  
ELFAAVNASCVVWKCCEDGKLELTNSNRKDVGN CISTKVVGSDRCEDITQNYKYPAGSLQE  
KEVLEKVQKERLKLKGDNGCEPWDPLHMF FESSIPLSGDGQLSVTLINPTDEEKKVHLVI  
GAQALY YNGVLAAGLWSKKQLFMLKPNQVMRLSTNLSFSCFEQTPPENSFLRV TAMARYHT  
SLSCFAQENMAIGKPDLI IEMP KRAAQYRPLTVSVRMHNSLEAPMQNCII SIFGRGLIHEK  
RYGLGSLWPGSSLHTQFQFTPTHLGLQRLTVEVDCDMFQNL TGYSVLVVA  
>chicken\_TGM1  
LVPRGLVVGSRADRIAHHTAEFCSPQLVVRRGQPFHLRVLLPRPFPDPEDSLCVELLLGPTP  
QVAKGTHVLIPLGETSATGWTAEEAGSGSPALRLRLSAPADAPIGRYRLSVKTRT GAPFDD  
RNDVIVLFNPWCEEDGVYMEQTNDLNEYVLNETGRIFYGTEEQIAERSWNYGQFDAGVLDA  
CLAILDRRRMPHSARGDPVMVTRVVSAMVNSLDDNGVLVGNWTGDTYQGTNP SAWAGSVDI  
LRSYHRGGAPVRYGQCWVFAGVVTTLRCLGVPTRT VTNYN SAHD TDVSLTTDIYFDENMK  
PLRLNTDSVWNFHVWND CWMRRPDL PAGYD GWQVVDATPQETSSGLFCCGP CSVTAVKNGE  
VFLKYDTAFVFAEVNSDKVYWQRKGNGAFAIVHVEEGAIGRRI STVGPQSAARIDITHLYK  
HPEGSEAERRAVSTATSHGSRPRSGAA-  
PSRGEVRLSLSSGPAVAGAELELKVTAHNAAPQPRTVRVRLSVCALRYTGVAAPPFRHEQH  
RRVAPGGEEQLCVAVPFSEYSPHVGSQDALRLTAAAAVETGEVVAKELRVRLAAPDLSMT

LLGPPVVGQEVSVQVLFNRNLPQKLTGAELRMEGAGLSCPASISVGTVAPEQTLRLRQPVV  
PLRAGRRLVAAMESAQLGPVHGELQFDAVP

>chicken\_TGM2

LVLETCDLQCERNGREHRTAEMGSQQLVVRRGQPFTITLNFGRGYEEGDKLAFDVTETGPCP  
VETSGTRSHFTLTDPEEGTWSAVLQQQDQATLCVSLCSPSSARVGRYRLTLEASTGGSSFH  
LGDFILLFNAWHPEDAVYLKEEDERREYVLSQQGLIYMGRDYITSTPWNFGQFEDILAI  
CLEMLDINNLDCSRNDPVYIGRVVSAMVNCNDDHGVLLGRWDNHYEDGMSPMAWIGSVDI  
LKRWRRLGQPVKYGCWVFVAAVACTVMRCLGVPSRVVTNYNNSAHDNTGNLVIDRYLSETGM  
EERRSTDMIWNFHCWVECWMTTRPDLAPGYDGWQALDPTPQEKSEGVCYCCGPAPVKAKEGD  
LQVQYDIPFVFAEVNADVYVWIVQSDGEKKKS-

THSSVVGKNISTKSVGRDSREDITHYKYPEGSEKEREVFSKAEHEKSSLG-----

EQEEGLHMRKIKSEGANNNGSDFDVFAFISNDTDKERECLRLRCARTASYNGEVGPQCFKDLL  
NLSLQPHMEQSVPLRILYEQYGNLTQDNMIKVVALLTEETGDSVVAIRDVYIQNPEIKIR  
ILGEPMQERKLVAEIRLVNPLAEPLNNCIFVVEGAGLTEQRIEELEDVEPQAEAKFRMEFV  
PRQAGLHKLMVDFESDKLTGVKGYRNVIIAP

>chicken\_TGM3

AAQPSTDWHVKENGRDHHTSKFSSKELIVRRGQAFVITF--

NGVEQPEQTLTFIVETGPKPSKQAKTQATFGISSVSKDSWSAVLQSTSSHVSVSISPPN  
AVIGRYKLSVQSTSTSSPETLGTFLVLLFNPWSSGDNVFMNKAECCEYVLEEFGLIFAGNN  
YHINSFGWNFGQFQADILNICLSMLDRSATDVSHRHDPKYLGRVLSAMVNaNDDQGVVLGN  
WSGNYDGGKSPSSWTGSGEILQSWKKSGKPVRYGQCWVFVAAVLTTVLRCLGIPTRPITNFS  
SAHDADGNLRVDEFYDASGNHLNEGADSVWNFHVWNESWFSRSDLGPSYSGWQILDATPQE  
ESGGIYQCGPASRNAVKEGDVLDYDCPFVFAEVNADCMYWSYDRARKKTLFLNKSTVIGQ  
LISTKAVGRDDRIDITSYKYEEGSKKERDIFKKARKKLGLEDKFDP IEQKPDISGKFKAG  
PLEVGKDLNLILVLKNLQSEVKSNNVNMATAWSTVYTRRPVREIWKDSLVSLSPEEEKHFP  
IKISYAEYQQQLTTDNAIEVTALCHVEGGIQVLVQRHIALDNPTIDIQVLGEAKVNEEMDV  
EVVFTNPIDIEVKDCVLQVEGSDLVRILKIDVPPLKAKDISSTKFKLTPFETGSKHLLVNF  
SCDKFADIKAFKTVKVID

>chicken\_TGM4

LKVTKVDFLKSQNSVQHHTDAYNTSNLVVRRGQPFLQLTLTSLRELRAADKLSLHFSIGERP  
MEPTGTLMSLNPRSRNVSGWQIAIIKSSGTECTLSVTSAPNAAVGIYGLMVKTGPNIYKPE  
KNTVYLLFNPWGECDIVFLSNEAERKEYVLNDTGIIYVGSANFNIHSPWNFGQFEESILDA  
CMYLLDKSKLKMSSRRDPVVVSRAMSALVNANDDNGVVLGNWVGKYENGTSPMAWIGSVAI  
LQQYYKTKKPVSYGQCWVFSGLVTTVMRCLGIPARSVSNFNSAHDTDENLRVDVYLNEKGE  
KLWMSSDSVWNFHVWVNDVWVKRDLPSGFDGWQAIDATPQEQSQGTFCGCPCLKAVKEGD  
VYLPYDSKFVYAEVNADKVYWRVKEENKYTKLGVESQSIGANISTKAVGQNRREDITWQYK  
FPEGSAEERASMKRAVSYLQPSGLTPRVVPKSGVQLEITEKPLCPGNPIEVTITVKSTVAG  
SWTVDLASSCQLQSYTGKVVHANLGYIKQTVKVEGQSEVHVPLKIMPDAYMKALADEEHVHV  
TAIAEIGTPEKLTKEASLSFEYPPIQVQMPETAKVNNDFTCAFIFKNKLNVLNDCKLMVE  
GLGIFKMATFDEGDIQPGRIIKSEVICTPTRVGEKKIVARLTSNQVKDISVEKAITVTH

>chicken\_TGM6

QKITKVDWHSKLNKAAHHTSDYNSTQIILRRGQAFAITLNFQTTVQPENNFTFIASTGSPSP  
AESQQTKAIFHLSEDAANGWSATQERCEPGRMSLMIVSPANAIIGRYNLIQVNSGIFSRF  
LGQFVLLFNPWPCPNDDVYMANEKERQEVVLNDSGIIFQGEKYIQQEAWNYGQFEEDILDI  
LSILDRSSTDVSNRNDPIYVCRVISAMVSNDEKGVVEGKWSGSYSRSGTNPLHWSGSVSI  
LRKWYRGRRPRIYGCWVFAGVMCTVLRSLGIPTRVITNFNSAHDSTNLSIDKYIDVSGK  
TLDLTSDSIWNFHVWNESWFTRRDLGSFYDGWQVLDATPQEKSKGIYRCGPASTRAIKEGD  
VNLDYDSSFVFAAVNADCVTWIIQHSNKRKERIYSNTRKIGKFISTKAVGTNTRVDVTNMYK  
YPEGSSKERQVYKKALKLLAVRSTGRRTTQKPTVSGKMKDAPPVIGQDILLTLALQNLTTD  
FKTVNVKLRAVAVLYTRPKAEILQWSRSVQLGAEEVKEISFKITYTQYKNALLDDRKILV  
TAVCEARQGASLLVEKDIVLQDPFLTIEVLGPTVVHKATNVLVTFTNPLSEVVTDVCLRAE  
GSLIKQLNINVARMAPMETATAEFEIVPYKSGIRQLQVDLACIHFVSNIKGFVMLDVAP

>chicken\_TGM6L

LKPTHISWQPSVNASAHHTDRYANTELTVRRGQPFTITLYFNRRQKYPGESLAFVTEIGPSP  
SESHRTRAVFNLSEVGASGWSAAQGPSESGYMTFIISSPANAIIGRYNLIQVNSGIFSRF  
LGQFVLLFNPWPCPGDDVYIANENERQEVVLNENGIIFVGNAKYIEARGWYYGQFQDHLNLI  
CLTMLDLSAVDVSRRGDPKYVGRVISSMINGNDDNGVLLGKWQGSFHSHPNSRWDGSVVI  
LQKWRQDNKPQYGCWVFAGVMCTVLRCLGIPTRLVSNFNSAHDVDRNLSIDKYDSSGK  
SLNISKDSTWDYHVWNESWFIKPDLPYRNGWQVLDATPQEQSRGLFQCGPASVVAIKEGD  
VDLDYDTLFFVYTEVNADCNRWIVYNDGTTKRVYCDTEIIGRFISTKAVGSNSRVDITCNKY  
YPEGSPEERRVYKKALAKIFGSHITEGAMRNPGISGKFAEPPVFGKDINLILILNNLSTD  
HKTVKVDISASSVLYTRRAVAEILKANTSVDLGSQKGKHIRLKIPYAYYGYLTTDKRIQV

TALCEVMHGVKLLVEKTIILEDTNII IKIPRRVVVNKAATLEISYANPLPEPVDRCVLLVT  
--LMNQVKIHLARLAPRERSRIYFEFTPRRTGPLQLQVDFSCDKFSHVKGFTIIVQ  
>chicken\_TGM5L  
IELGDVNLNCPNSNCQIHNTFFGTDRQIIIRRGQAFNFYASFNREWDDSDQATFTVETGLRP  
CESNETKCTFPMGRLDQTCWSASYKTHQPKCINISVFPPSNACIGRYILNMQITSCTYQRC  
LGDFYVLFNFWCADDPVYLDNQAQREEYILNEHGILYEGVHKHITSRPWHFGQFEDGILDI  
CLKILDMGDRDHWCWRNDPVHVSVMVNHMISSTTNSIMKIPENNDYLGKTKPFSWNGSVPI  
LQQWYNGRRPVRYGYCGSLASVMCTVMRCLGIPSRVVTNFCFPCSNNENPLGINEIFDCTGK  
NL-  
CGKDKLWRYHCWNESWMARRDLNQCCGDWQCLDPTPLETGRGSACSGPTWVRSIREGDLDL  
DYDGHSMSFRLNSNYAGWLSQNNAKKTKVFCDAWPCGQQLITKSVGSEQFEDITGNYKYEL  
GSVKSKEAYYRAYRRIHPGYCNASFLSDSGINTRLKANCPMYGEDVQLHWLLENLRSEPKN  
LKFNLCQAIIITYNGCPMDQFWKDSVTVALGPREVKKIPLCVSYSQYGPYLSHDNIMKVAV  
SDPECGEVLMVSRDIVINRPPVIVKLLSQPRLKVPCTAEISFCNPLQEDMKNCIMTLEGCG  
LFKPMTIDLGTLASNQARTIVEFTPYRLGSHRLLANLGCHKFAYCKGCAKAEVCN  
>chicken\_F13A1  
LRVVDIHMFKKEINKQQHHTDKYYNPKLIVRRGQPFQIQIDFSRPYDPEDQIWLEYLIGRYP  
QPNKGTYIPILIGDLKPGEWGAKITHRENNISIRLSIMSSATCIIGKFRLYIAIWTPTHNS  
ATDTYILFNPWCQLDAVYLDDEKEREYVLDNVGIVFHGDVNEVKLRWSYSGQFEENILDA  
CLFLMDKAELELSGRGNPIKICRVASAMINSKDDNGVLASWDNLYDYGVPSSAWTGSVDI  
LLEYYSKQPVRYGQCWVFAGVFNTFLRCLGIPARLITNYSSAHDNNANLQLDFFLDDEGQ  
VDRLTKDSVWNYHCWNEAWMTRPDLPGVFGGWQAVDGTPEQTSDDGMYRCGPASVQAIKHGH  
VCFQFDAPFVYAEVNSDIIYSRMGKNGSQVIEKIDTTHIGKLIIVTKGVGNDDMDVITENYK  
FQEGSAEERLALETAVMYGVKKQTTQPYQPQKDIEMDLQVQKVVLGSDFKVTIILRNKSRN  
SYTATTYLSGNIVFYTGVTKSEFKKHSFSAKLEPLLSNTFDVMITSAEYLNDDLDQASFHF  
FVTARIETGKVLAMQKAVVLEIPTLKIKTKGQMVVDRETSVVVEFTNPLKQTLLENATLRLE  
GPGVLRMTMKKEFRQIPAMSTLIWDVKCIPKRPGLRKLIASLNC DALRHVYGELNIQVQK  
>chicken\_EPB42  
LSAKKCDLKIIMNNNNHHTEEISTERLIVRRGQPFVITVNFSSPYLKQKRIFLSVQTGPQR  
SKADGTQVKFPISSGDQKQWSARLEEQDPYFWTISVNTPANASIGQYDLFLHASKA--  
CRLLGKFIILLFNPWCRDDEVFLPNEAQRQEYILNQDGVIIYSGTENEILAQPWDFRQFDVGI  
VDICFKLLDIGDQDHTQRKNPIYICRTVAAMMNCNL-  
ARILSESGTRECYDGTTPPSKWLGSNAILQQWAALQRPVRYGQCWVFAAVMCSVLRCLGIPT  
RVVTGFTWAHNTNSNPVNEYEEDGTLLPDKSARVWTFHVWNECWMARTDLLPEYSGWQA  
LDATCQKKSKGPSFCGPAPVQAIKEGDVEVDYDVCYFFAAMNAKCKVWIHMADDIFKPASI  
CTKYMGNISTKSVGSERCEDITHNYKYPEGSLQEKKVLDKVYRKTQTLQAISSEEEKVNL  
FIDLQKSSLILGQDIPLSIEVFNYSDREKATDLVLGVQSLHYNGVPIQLWKEKLNFIKS  
NEVRTLQVFPYPSQYGKELGKNRLLRLTATLRDEDSYIYFAQEEMSICDPPLTIEFPDNLV  
LYQPATVKISLLNPLAEPLEKCVIVVGGQGLIYQRKYRLGTVQPKSTQDLNISFTPTESGP  
RRLTAHLTCLQIQNLKSYKTINVAA  
>human\_TGM1  
LVVNGVDLLSDQNRREHHTDEYDEYDELIVRRGQPFHMLLLSRTYESSDRITLELLIGNNP  
EVGKGTHVPIIPVGKGGSGGWAQVVKASQNLNLRVHTSPNAIIIGKFQFTVRTQSDLPFDP  
RNEIYILFNPWCPEDIVYDHDWRQEYVLNESGRIYYGTEAQIGERTWNYGQFDHGVLD  
CLYILDRRGMPYGGRGDPVNVSRVISAMVNSLDDNGVLIGNWSGDYSRGTNP SAWVGSVEI  
LLSYLRTGYSPYGCWVFAGVTTTVLRCLGLATRTVTNFNSAHDTDTSLTMDIYFDENMK  
PLHLNHDSVWNFHVWNCWMKRPDLPSGFDGWQVVDATPQETSSGIFCCGPCSVESIKNGL  
VYMKYDTPFIFAEVNSDKVYWQRQDDGSFKIVYVEEKAIGTLIVTKAISSNMREDITYLYK  
HPEGSDAERKAVETAAAHGSKPNVYANRGS AEDVAMQVEAQDAVMGQDLMVSVMLINHSS  
RRTVKLHLVLSVTFTYTGVS GTIFKETKKEVELAPGASDRVTMPVAYKEYRPHLVDQGAMLL  
NVSGHVESGQVLAKQHTFRLRTPDLSLTLGA AVVGQECVQIVFKNPLPVTLTNVVFRLE  
GSGLQRPKILNVGDIGNETVTLRQSFVPVRPGPRQLIASLDS PQLSQVHGVIQVDVAP  
>human\_TGM2  
LVLERCDLELETNGRDHHTADLCREKLVVRRGQPFWLT LHFGRNYEASDSLTF SVVTGPAP  
SQEAGTKARFPLRDVEEGDWTATVVDQQDCTLSLQLTTPANAPIGLYRLSLEASTGGSSFV  
LGHFILLFNAWCPADAVYLDSEERQEYVLTQQGFIIYQGS AKFIKNIPWNFGQFEDGILDI  
CLILLDVNGRDCSRSSPVYVGRVVS GMVNCNDDQGVLLGRWDNNYGDGVSPMSWIGSVDI  
LRRWKNHGQRVKYGCWVFAAVACTVLRCLGIPTRVVTNYS AHDQNSNLLIEYFRNEFGE  
IQGDKSEMIWNFHCWVESWMTRPDLQPGYEGWQALDPTPQEKSEGTYCCGPVPVRAIKEGD  
LSTKYDAPFVFAEVNADVVDWIIQDDGSVHKSINRSLIVGLKISTKSVGRDEREDITHYK  
YPEGSSEEREAFTRANHLNKLAE-----  
KEETGMAMRIRGQSMNMGSDFDVFAHITNNTAE EYVCRLLLCARTVSYNGILGPECTKYLL  
NLNLEPFSEKSVPLCILYEKYRDCLTESNLIKVRALLVEVINSYLLAERDLYLENPEIKIR



ILGEPKQKRKLVAEVS LQNPLPVALEGCTFTVEGAGLTEQKTVEIPDVEAGEEEVKVRMDLL  
PLHMGLHKL VVN FESDKL KAVKGFRNVIIGP

>human\_TGM3

LGVQSINWQKAFNRQAHTDKFSSQELILRRGQNFQVLMIMNKGLGSNERLEFIVSTGPYP  
SESAMTKAVFPLSN GSSGWSAVLQASNGNTLTISISSPASAPIGRYTMA LQIFSQISSVK  
LGT FILLFNPWLNVD SVFMGNHAEREEYVQEDAGIIFVGSTNRIGMIGWNFGQFEEDILSI  
CLSILDRSATDVASRNDPKYVGRVLSAMINSNDDNGVLAGNWSGTYTGGRDPRS WNGSVEI  
LKNWKKSGSPVRYGQCWVFAGTLNTALRSLGIPSRVITNFNSAHD TDRNLSVDVYYDPMGN  
PLDKGSDSVWNFHVWNEGWFVRS DLGPSYGGWQVLDATPQERSQGVFQCGPASVIGVREGD  
VQLNFDMPFIFA EVNADRI TWLYDNTGKQWKNSVNSHTIGRYISTKAVGSNARM DVTDKYK  
YPEGSDQERQVFQKALGK LKPNTPF AAEEQEPSIIIGKLKAGMLAVGKEVNLV LLLK NLSRD  
TKT VTVNM TAWTIIYNGTLVHEVWKDSATMSLDPEEEAEHP IKISYAQY EKY LKSDNMIRI  
TAVCKVPDESEVVVERDIILDNPTLTLEVLNEARVRKPVNVQMLFSNPLDEPVRDCVLMVE  
GSGLLLNLKIDVPTLGPKERSRVRFDILPSRSGTKQLLADFSCNKFP AIKAMLSIDVAE

>human\_TGM4

LQVLHIDFLNQDNAVSHHTWEFQTSSPVFRRGQVFHLRLVLNQPLQSYHQLKLEFSTGPNP  
SI AKHTLVVLDPRTSDHYNWQATLQNESGKEVTVAVTSSPNAI LKGYQLNVKTGNHILKSE  
ENILYLLFNPWKEDMVFMPDEDERKEYILNDTGCHYVGAARS IKCKPWNFGQFEKNVLD C  
CISLLTESSLKPTDRRDPVLVCRAMCAMMSFEKGQGV LIGNWTGDYEGGTAPYKWTGSAPI  
LQQYYNTKQAVCFGQCWVFAGILTTVLRALGIPARSVTGFDSAHD TERNLTVDTYV NENGK  
KISMTHDSVWNFHVWTDAMWKRPDL PKGYD GWQAVDATPQERSQGVFCCGPSPLTAIRKGD  
IFIVYDTRFVFSEVNGDRLIWLVKMVEELHVISMETTSIGKNISTKAVGQDRRRDITYEYK  
YPEGSSEERQVMDHAFLLLSEREHRRPVKENFLHMSVQSDDVLLGNSVNFTVILKRKTA A  
LQNVN ILGSFELQLYTGKKMAKLC DLNKTSQIQGQVS-  
EVTLTLD SKTYINSLADEPVIRGFIIAEIESKEIMASEVFTSFQYPEFSIELPNTGRIGQL  
LVCNCIFKNTLA IPLTDVKFSLES LGISSLQTS DHGTVQPGETIQSQIKCTPIKTGPKKFI  
VKLSSKQVKEINAQKIVLITK

>human\_TGM5

LEVALTDLQSSRNNVRHHTEEITVDHLLVRRGQAFNLTL YFNRSFQPGDNII FVVETGPLS  
DLALGTRAVFSLARHSPSPWIAWLETNGATSTEVS LCAPPTAAVGRYLLKIHIDSFVTAYQ  
LGEFILLFNPWCPEDAVYLDSEPQRQEYVMNDYGF IYQGSKNWIRPCPWNYGQFEDIIDI  
CLKLLDKSATDCALRGSPVYVSRVVCAMINSNDDNGVLGNWSEN YTDGANPAEWTGSVAI  
LKQWNATGQPVRYGQCWVF AAVMCTVMRCLGIPTRVITNFDSGHDTDGNLII DEYYDNTGR  
ILNKKKDTIWNFHVWNECWMARKDLPPAYGGWQVLDATPQEMSNGVYCCGPASVRAIKEGE  
VDLNYDTPFVFSMVNADCMSWL VQG-  
GKEQKLHQDTSSVGNFISTKSIQSDERDDITENYKYEESGLQERQVFLKALQKLKARSFHG  
SPSDVVQVSLKFKLDPPNMGQD ICFVLLALNMSSQFKDLKVNLSAQSL LHDGSP LSPFWQD  
TAFITLSPKEAKTYPCKISYSQYSQYLSTDKLIRISALGEESPEKILVNKIIITLSYPSIT  
INVLGAAVVNQPLSIQVIFSNPLSEQVEDCVLTVEGSGL FKKQKVFLGLV LKPKQHQASII LE  
TVPFKSGQRQIQANMR SNKFKDIKGYRNVYVDF

>human\_TGM6

IRVTKVDWQSRNGAAHTQEYPCPELVVRRGQS FSLTLELSRALDCEEILIFTVETGPRA  
SEALHTKAVFQTSEERGEWTAAREAQM EKTLTVSLASPPSAVIGRYLLSIRLSSHHSNR R  
LGEFVLLFNPWCAEDHNVFLASEEERQEYVLSDSGII FRGVEKH IRAQGWN YGQFEEDILNI  
CLSILDRSATDVACSRHNPIYVTRVISAMVNSNDRGVVQGWQGYGGGTSPLHWRGSVAI  
LQKWLKGRKPVKYGQCWVFAGVLCTVLRCLGIATRVVSNFNSAHD TDQNL SVDKYVD SFR  
TLDLTEDSMWNFHVWNESWFARQDLGPSYNGWQVLDATPQEESEGVFRCGPASVTAIREGD  
VHLAHDGPFVFAEVNADYITWLWHEDESRERVYSNTKKIGRCISTKAVGSDSRVDITDLYK  
YPEGSRKERQVYSKAVNRLFGVEASGRPATKPSIAGKFKLEPPMLGHD LRLALCLANLTSR  
AQRVRVNLSGATILYTRKPVAEILHESHAVRLGPQEEKRIPITISYSKYKEDLTEDKKILL  
AAMCLVTKG EKLLVEKDITLED-  
FITIKVLGPAMVGVAVTVEVTVVNPLIERVKDCALMVEGSGLLQQLSIDVPTLEPQERASV  
QFDITPSKSGPRQLQVDLVSPHFPDIKGFVIVHVAT

>human\_TGM7

LRLESVDLQSSRNNKEHHTQEMGVKRLTVRRGQPFYLRLSFSRPFQSQDHITFVAETGPKP  
SELLGTRATFFLTRQPGNVWSASDFTIDSNSLQVSLFTPANAVIGHYTLKIEISQGSVTYP  
LGT FILLFNPWSPEDDVYLPSEIILLQEYIMRDYGFVYKGHERFITSWPWNYGQFEEDIIDI  
CFEILNKS AKDCSQRNDVVYVCRVVSAMINSNDDNGVLQGNWGEDYSKGVSPLEWKGSVAI  
LQQWSARGQPVKYGQCWVFASVMCTVMRCLGVPTRVVSNFRSAHNVDRLNLTIDTYYDRNAE  
MLTQKRDKIWNFHVWNECWMIRKDLPPGYNGWQVLDPTPQQTSSGLFCCGPASVKAIREGD  
VHLAYDTPFVYAEVNADEVIWLLGDGQAQEILAHNTSSIGKEISTKMVGSDQRQSITSSYK  
YPEGSPEERAVFMKASRKMLGPQRASLGRLRDQPAQLQLHARIP EWGQDLQLLLRIQRPDS  
THGLVVRFCAQALLHGGGTQKPFWRHTVRMNLDFGKETQWPLLLPYSNYRNKLTDEKLIRV

SGIAEVETGRSMLVLKDICLEPPHLSIEVSERAIEVGKALRVHVTLTNTLMVALSSCTMVL  
GSGLINQIAKDLGTLVAGHTLQIQLDLYPTKAGPRQLQVLISSNEVKEIKGYKIDFVTV  
>human\_F13A1  
LNVTSVHLFKDNTNKVDHHTDKYENNKLIIVRRGQSFYVQIDFSRPYDPRDLFRVEYVIGRYP  
QENKGTIYIPVPIVSLQSGKWGAKIVMREDRSVRLSIQSSPKCIVGKFRMYVAVWTPTSRNP  
ETDTYILFNPWCEDDAVYLDNEKEREYVNLNDIGVIFYGEVNDIKTRSWSYQGFEDGILDT  
CLYVMDRAQMDSLGRGNPIKVS RVGSAMVNAKDDEGVLVGSWDNIYAYGVPPSAWTGSVDI  
LLEYRSENPNVRYGQCWVFAGVFNTFLRCLGIPARIVTNYFSAHDNDANLQMDIFLEEDGN  
VNKLTKDSVWNYHCWNEAWMTRPDLVPGFGGWQAVDSTPQENS DGM YRCGPASVQA I KHGH  
VCFQFDAPFVFAEVNSDLIYITAKKDGTHVVENV DATHIGKLI VTKQIGGDGMMDITDTYK  
FQEGQEEERLALETALMYGAKKPLNTEMKSRSNVDMDFEVENAVLGKDFKLSITFRNNSHN  
RYTITAYLSANITFYTGVPKAEFKKETFDVTLEPLSFKKEAVLIQAGEYMGQ LLEQASLHF  
FVTARIETRDVLAKQKSTVLTIP EIIKVRGTQVVGSDMTVTVEFTNPLKETLRNVVWHL D  
GPGVTRPMKKMFREIRPNSTVQWEEVCRPWVSGHRKLIASMSDSL RHVYGELDVQIQR  
>human\_EPB42  
LGIKSCDFQAARNNEEHHTKALSSRRLFVRRGQPFTIILYFRAPFLPAKKVALTAQTGEQP  
SKINRTQATFPISSGDRKWSAVVEERDAQSWTISVTTPADAVIGHYSLLLQVSGR-  
KQLLLGQFTLLFNPWNREDAVFLKNEAQRMEYLLNQNGLIYLG TADCIQAESWDFGQFEGD  
VIDLSLRLLSK-  
DKQVEKWSQPVHVARVLGALLHFLKEQ RVLPTPQTQATQEGALLNKRRGSVPILRQWL TGR  
RPVYDQGAWVLA AVACTVLRCLGIPARVVTTFASAQGTGGRLLIDEYYNEEGLQNEGQRGR  
IWIFQTSTECWMTRPALPQGYDGWQILHPSAPNGGGVLGSCDLVPVRAVKEGTLGLTPAVS  
DLFAAINASCVVWKCCEGDGTLELTD SNTKYVGNNISTKGVGSDRCEDITQNYKYPEGSLQE  
KEVLERVEKEKMEREKDNGLETASPLYLLLKPSLPLRGDAQISVTLVNHSEQEKAVQLAI  
GVQAVHYNGVLA AKLWRKKLHLT L SANLEKIITIGLFFSNFERNPPENTFLRLTAMATHES  
NLSCFAQEDIAICRPHLAIKMPKAEQYQPLTASVSLQNSLDAPMEDCVISILGRGLIHER  
SYRFRSVWPENTMCAKFQFTPTHVGLQRLTVEVDCNMFQNL TNYSVTVVA  
>zebra\_finch\_TGM1  
LAPVWLRPGSSTNRTAHTQEFPARPLVVRGQRFHVGMR LPREPRTGDGICLELT LGPNP  
QVAKGTHVLVPLGGSSPTGWSAEVDENSGHALWVGLTAPPTAPIGRYRLSARTRTEAPFEP  
DNDLVLLFNPWCQEDSVYMEQTS DLSEYVLNESGRIFYGTEEQIAERAWNYGQFEPGV L DA  
CLFILDRRGMPHGARGDPVMVARVVSAMVNSLDDSGVLVGNWTGDYSQGTNPSAWAGSVGI  
LRSFHGTGSPVRYGQCWVFAGVVTTLRCLGLPTRTVTNYS AHDTDTSLTTDIYLDEAMR  
PLRLNTDSVWNFHVWNCWMKRPDLPEGYDGWQVVDATPQETSSGLFCCGPCSVKAVKNGD  
VFLKYDTPFVFAEVNSDKVYWQRQAHGGFAVVHVEEGAIGRRI STL GATGHARVDITDQYK  
HPEGSEEEERRAVSAATSHGSRPRQGRP-  
TSGGEVTMTVGS GPAVAGADLELRAVLKNGGLEPRTLRLRFS LCAVRYTG VAGAAFRQEQH  
RRTLPPGQEDTVTMTVTYTEYQPHVGDQDALKLTVA AAVESGQVLAKELLVRLHTPELTLT  
LLGPAVVGRPVSVQVVFQNP LPA PLPSASLRMEGAGIACPKPLALGSLGAGQTLRLS QSVT  
PLRAGQRRLVATLESAALPPLSGCVQFSAQT  
>zebra\_finch\_TGM2  
LVLETWDLHCDRNGREHRTAAMGCGQLVVRGQPF AITLRFGRAYDEADKLSFNVETGPF P  
SETSGTSSHVMTDPEESCWSAVIQQEGESLSVSLCSPANACIGRYRLTLETCTDGSSYQ  
IGDFILLFNPWHPEDTVFMRDENERREYVLSQDGLIYQGTCDYIYSIPWNFGQFEDEV LAI  
CLNMLDINNQCDSRRNDPVYIGRVVSAMVNCNDRGVLFGRWDNCYDDGMSPMAWIGSVDI  
LKRWKKFGQPVKYGQCWVF AAVACTVMRCLGIPSRVVTNYS AHDTNANLTIDRYVNENGE  
QERQSWDKIWNFHCWLESWMARPDLAAGYDGWQVLDPTPQEKSEGIYCCGPAPVKAIKEGD  
MLLKYDIPFIFA EVNADVYVWVVG DGMQKQS-  
IRSSDVGKNISTKSIGRDSREDITHNYKYPEGSEEEERAVFEKA EHQKKSIG-----  
EEDEGLHLRIKSEGANKGSDFDVFAVVTNNTDEERVCRVTLCARAASHNGTLGPQCLTDQV  
DMDIEPRAEKRVPLRILYEEYRDKLTQDNLIKVVALLKDQTDGDIIVAVRDIYVENPPIKIR  
ILGEPMQNRKLVAEISLVNPLTVPLNGCVFVVEGTGLTEQLVKELEEVEPQAEAKFRMDLM  
PRLTGLQKLMVDFESDHLTG VKGYRNVI IAP  
>zebra\_finch\_TGM3  
ATQPRTDWHLKENAREHHTSKFSSEELIVRRGQAFTITF--  
NGTERPEQNLIFIAETGPKPSKATKTLATFDISSVSKEGWSAVLQSSSSSSVSISISSPHN  
AVIGRYRLSVQS---  
SSPHNLGTFVLLFNPWSSGDDVFM PNKAECEEYVLEEFGIIFAGKNHINSFGWNFGQFQG  
DILNICLSIMDRSLTDVAHRHDP RYLGRVLSAMVNANDDQGVVLGNWSGKYEGGKNPTSWT  
GSGEILQSWKKSGRPVKYGQCWVF AAVLTTVLRCLGIPTRTITNFSSAH DADGNLRVDEFY  
DADGNHLERGADSVWNFHVWNESWFTTRNDLGPSYSGWQVLDATPQEESGGIYQCGPTSRHA  
VKEGEVELDYDGPVFAEVNADCMYWNYSAGKKT LIFSKSTEIGASISTKAVGRDDRVDV  
TRDYKYEESAKEREIFKKARKKLGLEDKFD PVEQKPDISGKFKAGSLEVGKDVNLLLVLE

NLQSDAKTVHVNMATAWSTLYTRRRVNQIWKDSISVTLAPKEEKQFP I K I K Y P E Y Q Q Q L T T D  
K T I Q V T A L C H V E D G M Q V L V K R N I T L D N P A I D I Q V L G E A K V N K E V F V E V T F T N P I D E E M K D C  
M L Q V E G S D L L Q I L E L R I P P L K A S E K S S T K F K L I P S E A G P K H L L V N F S C D K F A D I K T F K M V N  
V I N

>zebra\_finch\_TGM4

L K V T E I D F L K R Q N T Q Q H H T D G Y N I K N L V V R R G K P F Q V Q V S L S R E L R A A D K L S L S F S I G E N P  
M K N R G S L L S L K P E R E D P N G W K V S V V K K N G N E C L L S V T S S P N A P V G K Y N L H V K T G T N I Y T P E  
N G V I Y L L F N P W C E D D A V Y M A D E A E K E E Y V L N D T G Y I Y V G S A Y S I Y D R P W N F G Q F E E F V L D A  
C M Y L L D K S K L K L T E R R D P A H V S R A M S A L V N A N D D S G V L L G N W S G N Y A N G T S P M D W I G S V T I  
L Q Q Y Y K T K K P V R Y G Q C W V F A G V L N T V M R C L G V P C R C V S T F D S A H D T E E N L T V D I Y L N E K G E  
K L S L S F D S V W N F H V W N D A W M K R T D M P N G F S G W Q A I D S T P Q E Q S Q G R F Q C G P C P V K A V R E G D  
V Y L P Y D A K F V Y A E V N A D R V Y W V V K K V D K Y F K V G T E T Q A I G K N I S T K A V G Q N R R E D I T R E Y K  
Y P E G S K E E R M S M Q R A Y S F I R P S G L M P R P V T E T G L N L E I T T E P L H P G N P L E L A I T V K I S A P G  
N W T V N L T G S C Q L Q Y Y T G N V Q A N L G T I K E T I N L E G P S E M Q I P L K I A P D A Y M K T L S D E V L I L V  
T A I A E V E T N D K L T K E T S M R F E Y P P I T V Q M P E T A K L Y N D F N C A F I F K N K L N V T L E N C K L L V E  
G L G I F K M T T F D L G D I M P G K I V K S E I T C T P T R L G E K K I V A K L I S N Q I K G I S A E K G I F I T E

>zebra\_finch\_TGM6

L K I G K V N W Q S K L N K A A H H T S D Y S S T E L I L R R G Q P F N I S L N L K T T A Q S W D N L T F I A S T G P S P  
A E S Q Q T K A I F A L S E E G A N G W S A T Q E P S E P R C L N F T I L S P A D A V I G R Y K L Q L Q V L A G V S S K V  
L G Q F V L L F N P W C P D D D V Y M A D E K E R Q E Y V L N D S G I I F Q G L E K D I Q E E A W N Y G Q F E E D I L D I  
S L A V L D R S A V D V S K R N S P V Y V S R V I S A M V N S N D E K G V V E G K W S G K F R S G T N P L R W S G S V A I  
L R R W Y R A R R P V R Y G Q C W V F A G V T C T V L R C L G I P T R V I T N F N S A H D K N L N L S V D K Y I D V S G N  
N L H L S E D S V W N F H V W N E S W F I R R D L G S F Y D G W Q V L D A T P Q E K S K G I Y Q C G P A S T R A I K E G D  
V N L D Y D S P F V F A A V N A D C V T W I R Y S K K R K E R I Y S D T R K I G K F I S T K A V G T N S R V D V T A N Y K  
Y P E G S A K E R Q V Y N K A L K L L G V R R P G K R P A E T P S V S G K L L D A S P V V G Q D I P L T L T L R N L T S D  
F N T I K V K L K A S A I L Y T R R P K A E I L Q L H R S V K L G S E E V K E I S F K I S Y S Q Y K N S L M D D R K I L V  
T A V C Q I K R G A S L L V E K D I V L Q D P F L T I K V L G P A V V H K P V S V E V T F T N P L C D E V T D C V L R A E  
G S G L L K Q L R I R V E R M A P M E T S T V K F E I I P Y R S G T R Q L Q V D L V C T H F S D I K G F V M L Q V A P

>zebra\_finch\_TGM5L

I E L G E V D L N C P S N C Q I H N T H F F G T D R Q I I R R G Q A F S F Y A R F N R E W D D T D Q A A F T V E T G L R P  
C E S N E T K C T F P M G R L D Q T C W S A S Y K V H Q P K C I S I S V F P P S N V C I G R Y I L N M Q I T S C T Y Q R C  
L G D F Y V L F N P W C A D D P V Y L D N Q A Q R E E Y V L N E H G I L Y E G V H K H I T S R P W H F G Q F E D G I L D I  
C L K I L D M G D R D H C W R N D P V H V S M V V N H M I S S H T T N S I M K I P E N N D Y L K G T K P F S W N G S V P I  
L Q Q W Y S G R R P V R Y G Y C G S L A S V M C T V M R C L G I P S R V V T S F C F P C S M E N P L G I N E I F D S T G K  
N L -

C G K D K L W R Y H C W N E S W M A R R D I N Q C C G D W Q C L D P T P L E T G R G S A C S G P T W V R S I R E G E L D L  
D Y D G H H M F S R V N S N Y V G W L S Q N N A K R T K F F C D T W P C G Q R L I T K S V G S E Q F E D I T G A Y K Y E L  
G S V K N K E A Y Y R A Y R R I H P G Y C N A S F L S D S G I N M R L K A N C P M Y G E D V Q L N W L L E N L R N E N K T  
L K F N L C A Q I I T Y S G C P M D Q F W K D S V N V T L G P R E V K K I P L C I S Y N Q Y G P Y L C D H N I M K V V A V  
S D P E C G E I L M V S R D I V V N R P P V I V K L L S Q P R L K V P C T A E I S F C N P L Q E D M K N C V M T L E G C G  
L F K P M T I D L G T L A S N Q Q A R T I V E F T P Y R L G C H R L L A N L G C H K F A Y C K G C A K A E V C C

>zebra\_finch\_F13A1

L S V V D I Y M F K E I N K Q E H H T D K Y Y N P K L I V R R G Q A F Q I Q I D F N R P Y K P E D Q F W L E F L M G R Y P  
Q Q N K G T Y I P I L V G N L K P G Q W G A K I I H R E N N S I R L S I M S S T T C I I G K F R F Y V A V M T P T R R N S  
A T D T Y I L F N P W C Q L D A V Y L D D E K E R E E Y V L N D V G I V F H G N V E D V K S R S W S Y G Q F E E N V L D A  
C L F L M D K A E L E L S G R G N P I K I C R V A S A V I N S R D D N G V I A G S W N N T Y D Y G V A P S A W T G S V D I  
L L E Y Y S S K Q P V R Y G Q C W V F A G V F N T F L R C L G I P A R L I T N Y S S A H D N N A N L R M D F F L D D E G K  
V D R L T K D S V W N Y H C W N E A W M T R P D L P V G F G G W Q V V D G T P Q E T S D G M Y R C G P A S V Q A I K H G H  
V C F Q F D A P F V Y A E V N S D I F Y T R M E K N G T Q V V E N I D T T H I G Q L I V T K A V G G D G M V D I T E Q Y K  
F R E G S D E E R L A L E T A V M Y G V K K Q S I Q D Y Q P Q T D V D M D F Q V Q A V L G N D F K V T I T F R N K S R N  
S Y T A T T Y F S G N I V F Y T G V T K T E F K K H S F S A K L E P S S S S S F D I V I K S S E Y M S D L L E Q A S F H F  
F V T A R I E T G K I L A V Q A I M L E I P T L R I K T K G E L V A G K E T S V I V E F T N P L K Q T L E N V M L R L E  
G P G V L R T I K K Q F G R I P M N S T L T W E V K F T P M R P G L Q K L I A S L N S D A L R H V Y G E L N I Q I R K

>zebra\_finch\_EPB42

L S I Q K C D F M I P E N N K S H H T E E I S T K R L I V R R G Q P F T I T V S F S V P F L K Q K R T F L V V Q T G P H S  
S K A D E I Q A E F P I S S G D Q K Q W S A A V E E Q D P N F W T L C V N T P A N A P I G Q Y T L L F R A S K S - -  
P Q L L G S F T L L F N P W C Q D D E V F L A N E A Q R Q E Y I L N Q E G I I Y Q G T E N A I L A Q P W E F S Q F E E D M  
L D I C F I L L A L G E K D P A Q R K N P V H V C R A V A A M V N C N E -  
F R S L T E Y E P G Q H D N G T P P S T W L G S S P I L Q Q W I A S K Q P V R Y G R C W V F A A V L C S V L R C L G I P T  
R V V T G F T W A H N T K C S L S V D E Y Y D E D G T L L Q D K S A H V W T F H V W N E C W M A R S D L L P K Y S G W Q A  
L D A T C Q E K S T G L S F C G P A P V H A I K E G D T Q V D Y D V C Y F F A A I N A K C H V W I H K A D D T L K P A Y G  
G T K Y T G N N I S T K S V G S E R C E D I T Q N Y K Y P E G S L Q E K K V L D K A F R N M K E L K T T S S L E E P L N L  
F I H F Q S S S L Q L G Q D I T L S I E V F N N S D R E K A T H L V A G I Q A L H Y N G V P I A Q L W K E E F H F N L H S

```

NSVNNLRVSVPYTWFGKELGENHLLRLTAVLRDDSSMYLAQEEISLCDSPLTIEFPENMV
QYEPSTAKISLQNPLMEPLEQCVIAVAGRGLIYQRNYRLGSVQAKSTQELQIPFTPTRAGP
RRLTARLTCLQLQNLKSYRTTNIAA
>fruit_fly_TGM
LGVLKVDLCLEDNHEEHHTSHFAKEALVVRGEPFRLKIHFNRDYSPSDAISFIFTVATKP
SPGHGTLNALVPHDGTLEWGAGIESHEGQTLTVLIKPPSTCPVTEWKLDIDTKLLRSYPL
PLPIYVLFNFWPCDDQVYLEDRDQRKEYVMHDTTLIWRGSYNRLRPSVWKIGQFERHVLEC
SLKVLGTVRIPPAYRGDPVRVARALSALVNSVDDDGVLGNWSEDFSGGVAPTKWTGSVEI
LQQFYKTQKSVKFAQCWNFSGVLTTIARSLGIPSRIITCYSSAHDQTASLTVDFIDANNK
KLAETTDISIWNHYHVWNLWMQRPDLGVGFDGWQVVDATPQEASDNMYRVGPASVAAVKNGD
ILRPFDDGGFVFAEVNADKLYWRYNGPQPLKLLRKDTLAIGHLISTKAVLKWEREDITDTYK
HAERSEEERSTMLKALKQSRHAFSRYNDNFNDIEFDMEKDDIKIGQSFSVVLKVSNNKSES
RTMATGQISCDVLYTGVGAVEVKTGLGFELELEPKSSDYVRMEVIFEEYYDKLSSQAAFQI
SAAAKVDTDYDYAQQDDFRVRKPDIKFQLGEAAIVQKELDVILRLLENPLPIPLHKGVFTVE
GPGIEQPLKFKIAEIPVGGTAAATFKYTPPYAGRGTMlakFTSKELDDVDGYRHYEIEP

```

**Figure S2. Alignment of trimmed amino acid sequence of transglutaminases used for the phylogenetic analysis.** The multiple sequence alignment is shown in fasta\_aln format. Sequence regions that could not be aligned unambiguously were removed. GenBank accession numbers are listed in Table S1.

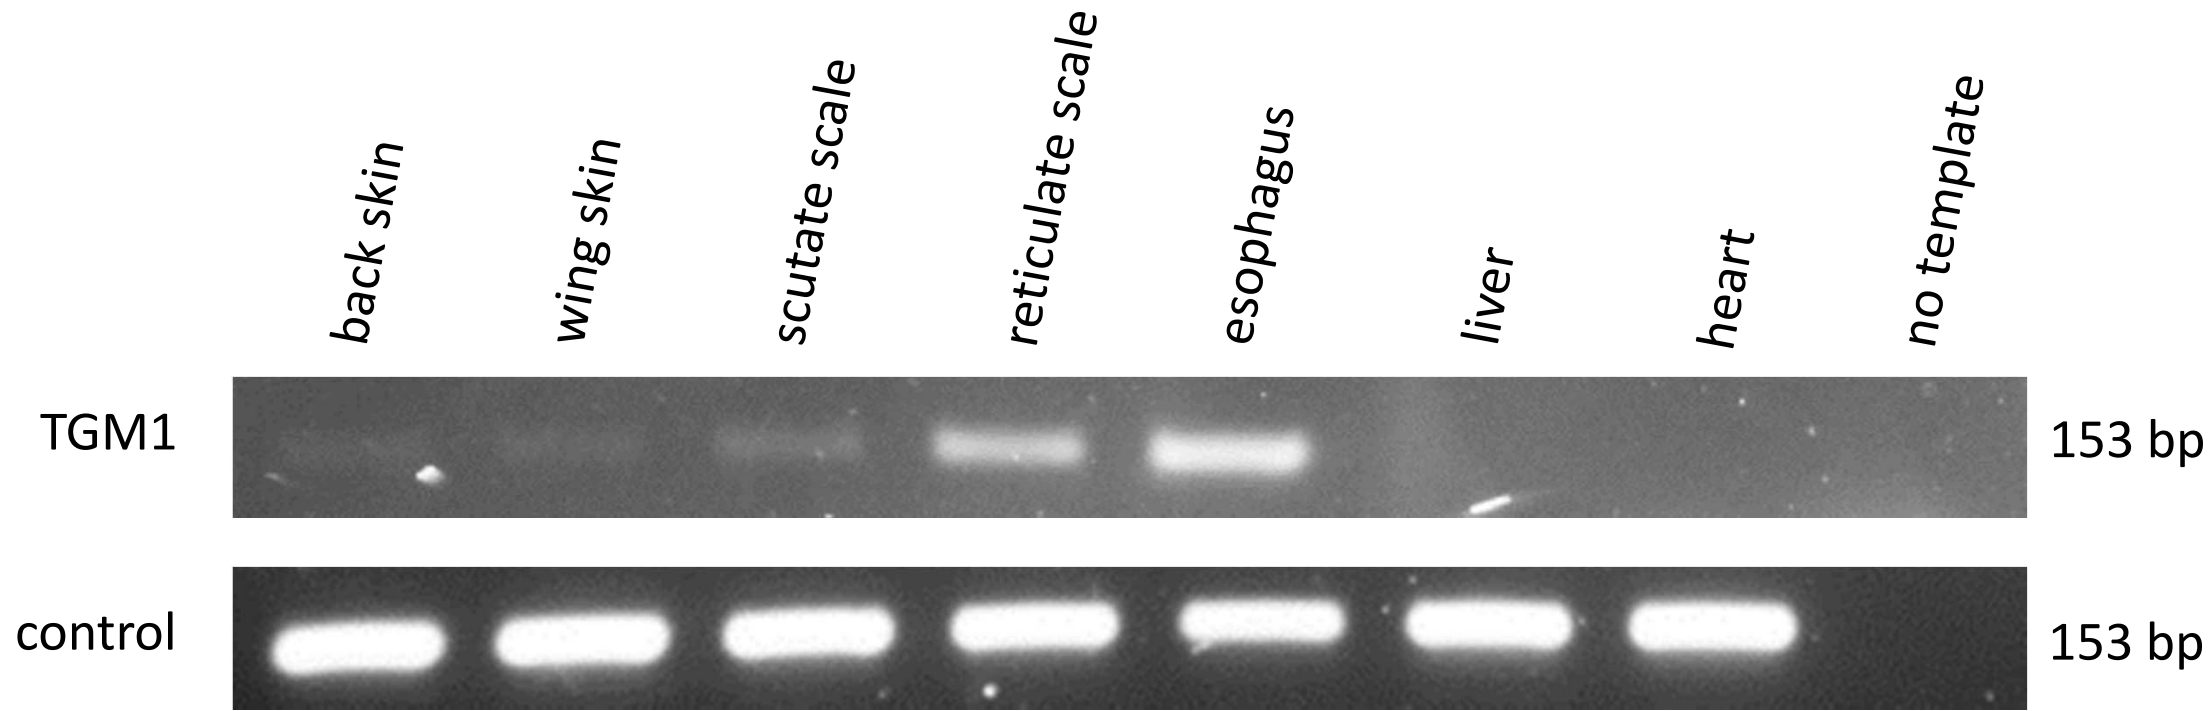

**Figure S3. Expression of zebra finch *TGM1* in selected tissues.** RNA from the indicated tissues and cultured cells was subjected to RT-PCR with primers specific for *TGM1* and the house-keeping gene *EEF1A1* (control). PCR products were analyzed by agarose gel electrophoresis, revealing bands that correspond to the predicted size of the PCR products. *TGM1* is expressed, to a small extent, in the skin (back skin and wing skin), and skin appendages (scutate scale and reticulate scale) of the zebra finch. The strongest expression of *TGM1* was detected in the esophagus. *TGM1* is not expressed in the liver or the heart.

# A

Chicken *TGM1*, last but one intron (partial), GenBank accession number JAENSL010000336.1, nucleotides 1-811

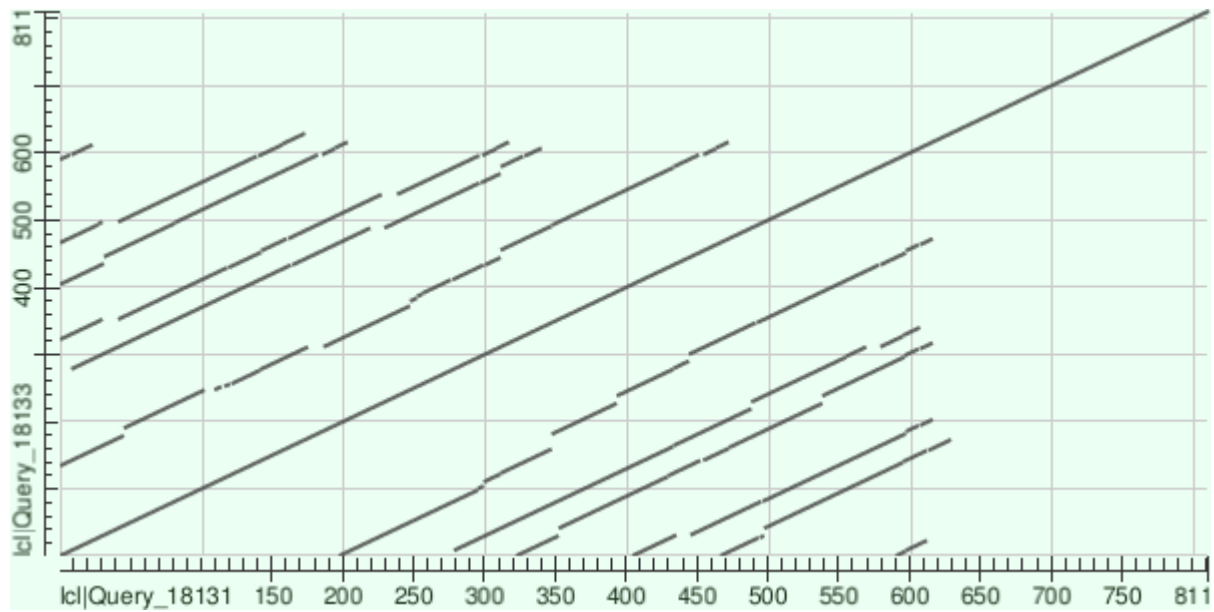

# B

Chicken *TGM1*, last intron, GenBank accession number JAENSL010000336.1, nucleotides 958-1783

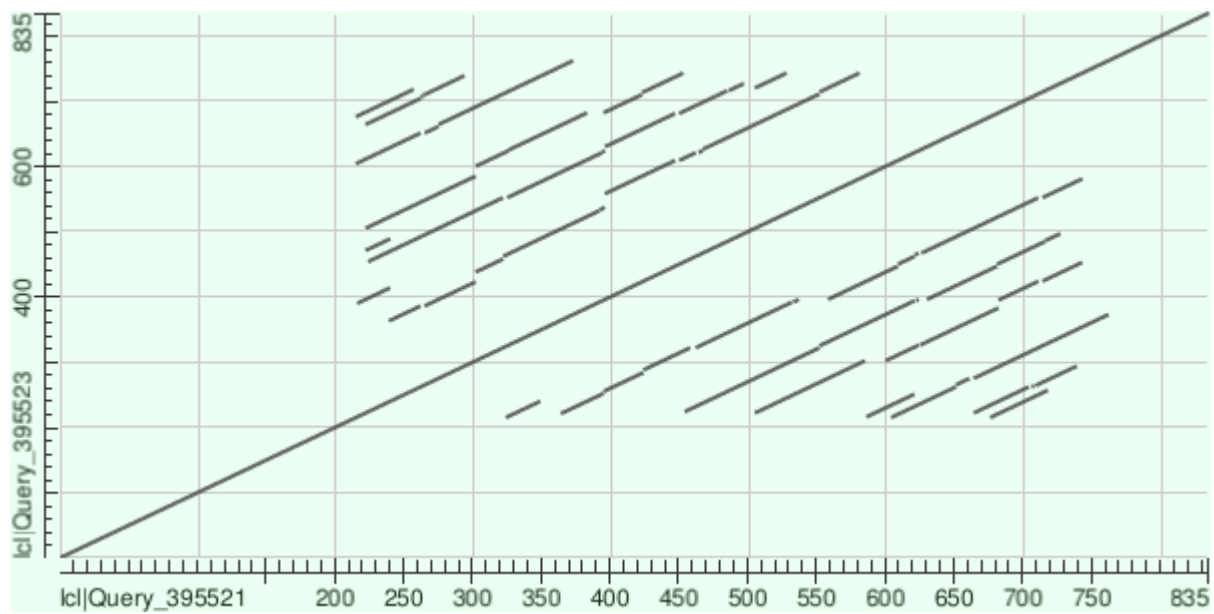

[illegible]

Figure S4, page 3



Figure S4, page 4

Figure S4, page 5

Figure S4, page 6

Figure S4, page 7

D

Figure S4, page 8

# E

Dot plot: Zebrafinch *TGM1* intron 1 vs. zebrafinch *TGM1* intron 1

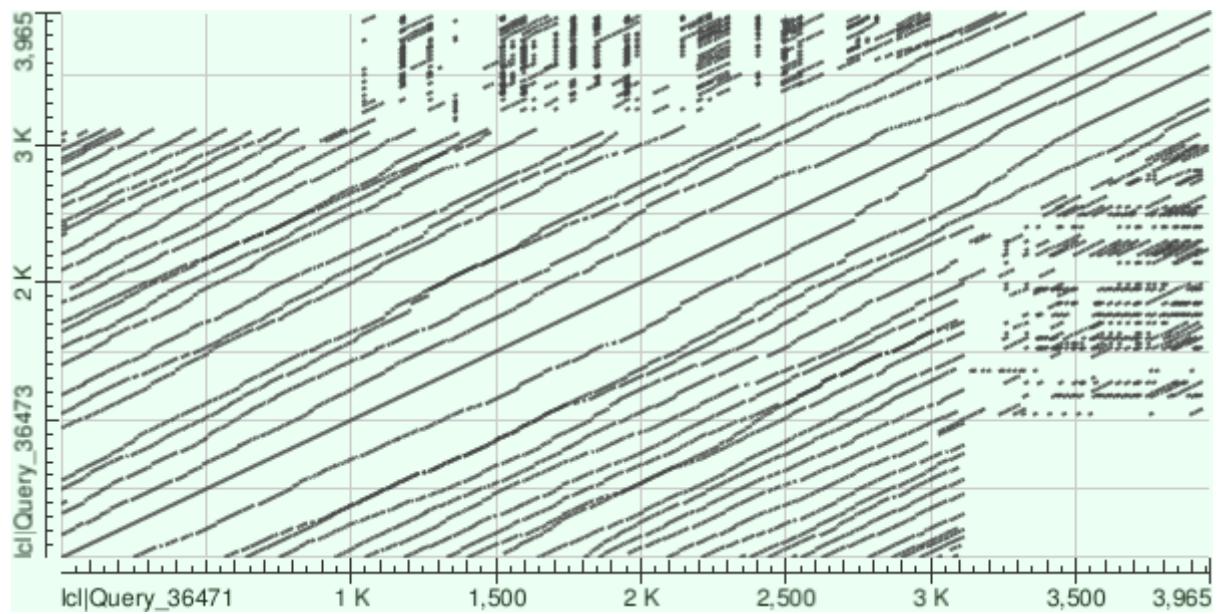

# F

Dot plot: Zebrafinch *TGM1* intron 2 vs. zebrafinch *TGM1* intron 2

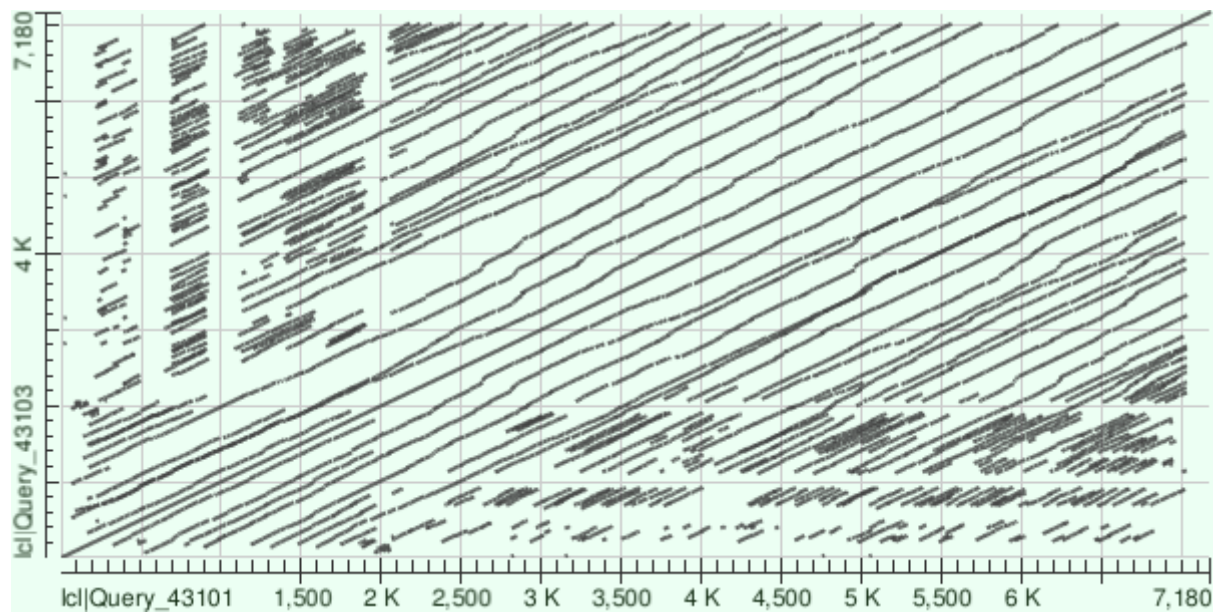



# G

Dot plot: Zebrafinch *TGM1* intron 3 vs. zebrafinch *TGM1* intron 3

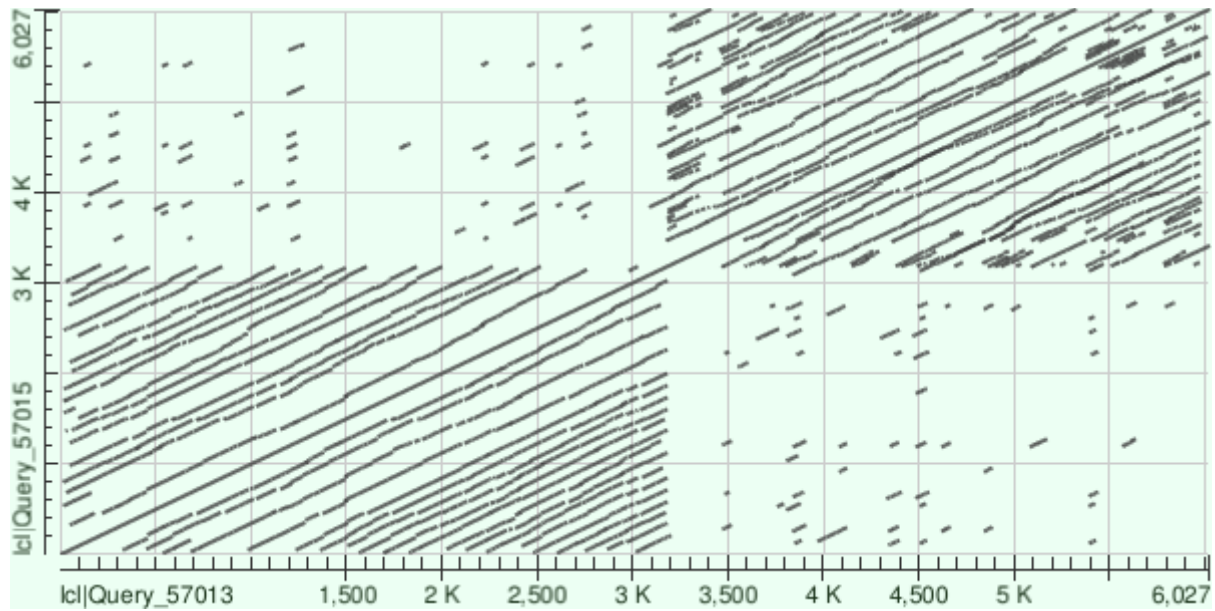

# H

Dot plot: Zebrafinch *TGM1* intron 4 vs. zebrafinch *TGM1* intron 4

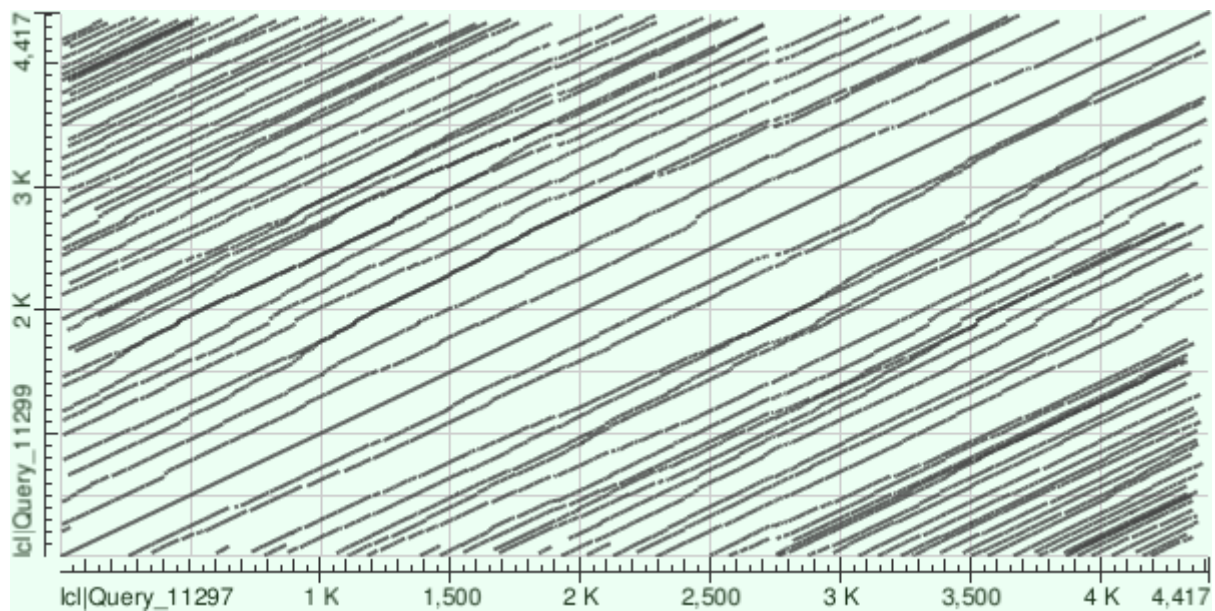

103

[illegible]



J

A scatter plot showing the relationship between  $\log(\text{Query\_cardinality})$  (x-axis) and  $\log(\text{Join\_cardinality})$  (y-axis) for the 'log' model. The x-axis ranges from approximately 3.5 to 13.1, with major ticks at 4 K, 6 K, 8 K, and 10 K. The y-axis ranges from approximately 3.5 to 13.1, with major ticks at 10 K and 13,117. A solid black line represents the linear fit. Three data points are plotted as black dots. The first point is on the line at approximately (3.8, 4.5). The second point is slightly above the line at approximately (4.2, 5.2). The third point is significantly below the line at approximately (4.0, 4.2).

Figure S4, page 12



Figure S4, page 14

**L**

Dot plot: Human *TGM1* vs. human *TGM1*

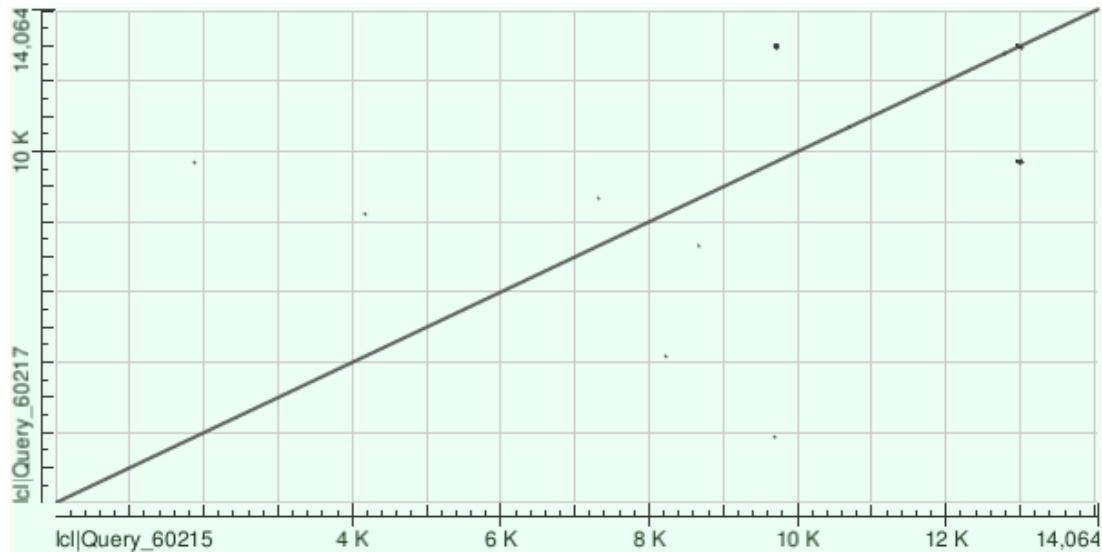

**Figure S4. Dot plot analysis of chicken *TGM1* introns and zebra finch *TGM1* in comparison to zebra finch *TGM2* and human *TGM1*.** To visualize sequence repeats, the nucleotide sequences of the last-but-one **(A)** and last **(B)** intron of chicken *TGM1* (accession numbers provided in the figure) were subjected to dot plot analysis using the NCBI BLASTn tool using default parameters (Word size 11; Expect value 0.05; Match/mismatch scores 2,-3, Gap costs 5,2; Filter string F; Genetic code 1; Karlin-Altschul statistics: Lambda 0.633731, 0.625; K 0.408146, 0.41; H 0.912438, 0.78). The dot matrix view shows regions of sequence similarity based upon the BLAST results. The same sequences were used as query (X-axis) and subject (Y-axis). Numbers represent nucleotides. Alignments are shown as lines. Plus strand matches are slanted from the bottom left to the upper right corner, and minus strand matches are slanted from the upper left to the lower right. The number of lines shown in the plot is identical to the number of alignments found by BLASTn. Nucleotide sequences of zebra finch *TGM1* **(C)**, zebra finch *TGM2* **(I)** and human *TGM1* **(K)** are shown in FASTA format with color-coded nucleotides. The nucleotide sequences of zebra finch *TGM1* **(D)**, zebra finch *TGM2* **(J)** and human *TGM1* **(L)** and the sequences of zebra finch *TGM1* intron 1 **(E)**, intron 2 **(F)**, intron 3 **(G)** and intron 4 **(H)** were subjected to dot plot analysis. K, kilo (1000).
